# Supplementary material
Source: PubMed Central journal article supplement (PMC8406737)

Table S3. Effect sizes for behavior outcomes among studies targeting negative affective states

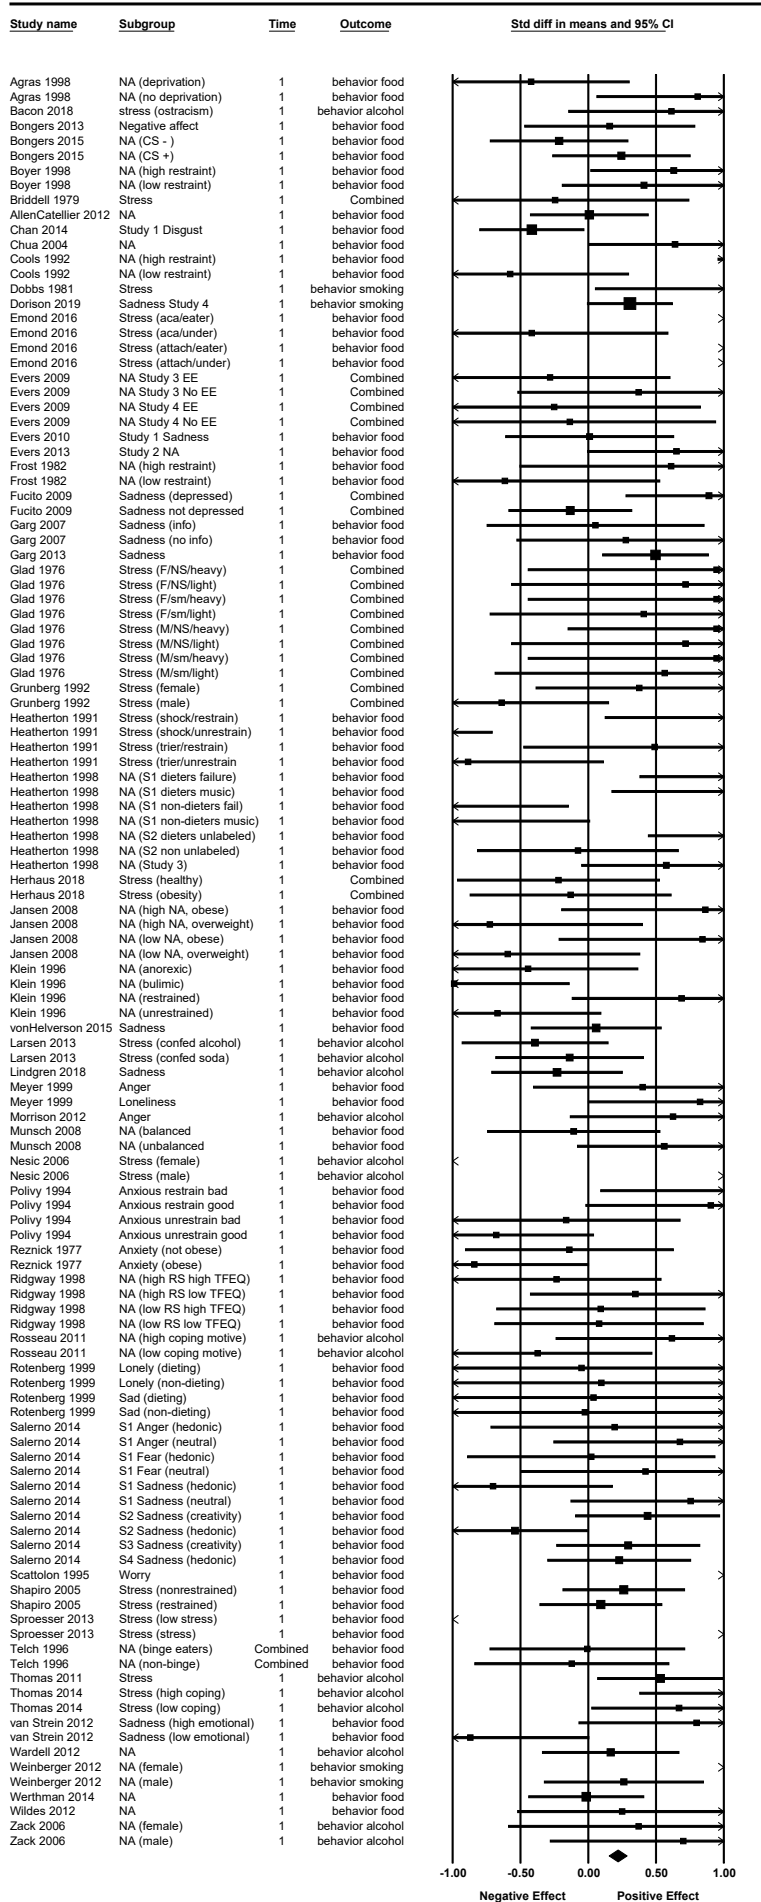

Table S4. Effect sizes for intention outcomes among studies targeting negative affective states

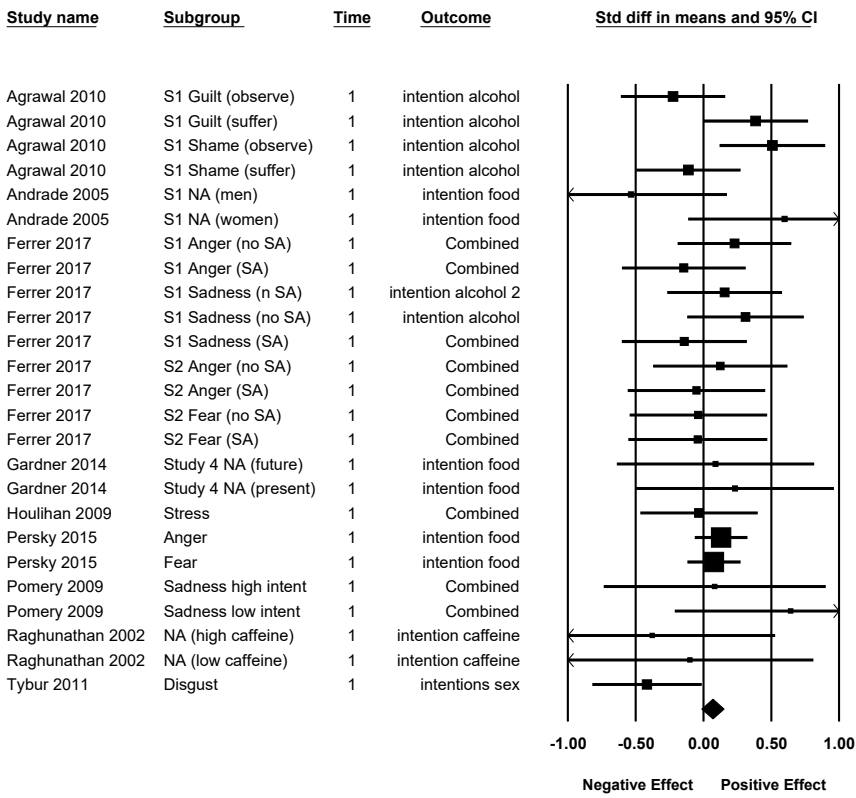

Table S5. Effect sizes for craving outcomes among studies targeting negative affective states

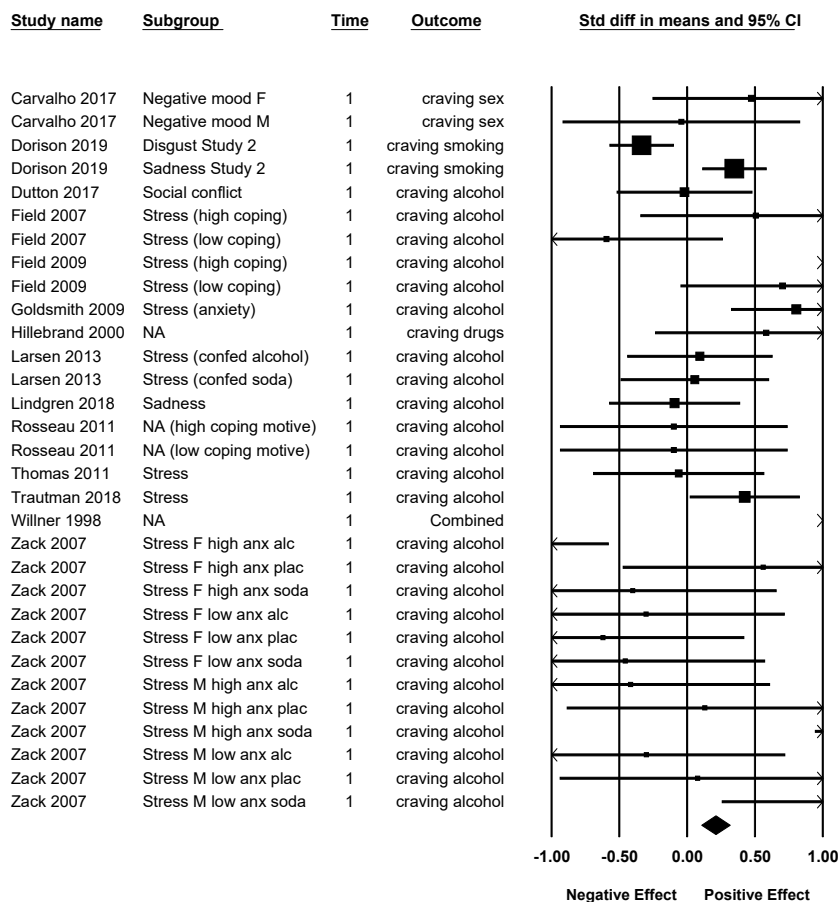

Table S6. Effect sizes for attitude/ evaluation/ expectancy outcomes among studies targeting negative affective states

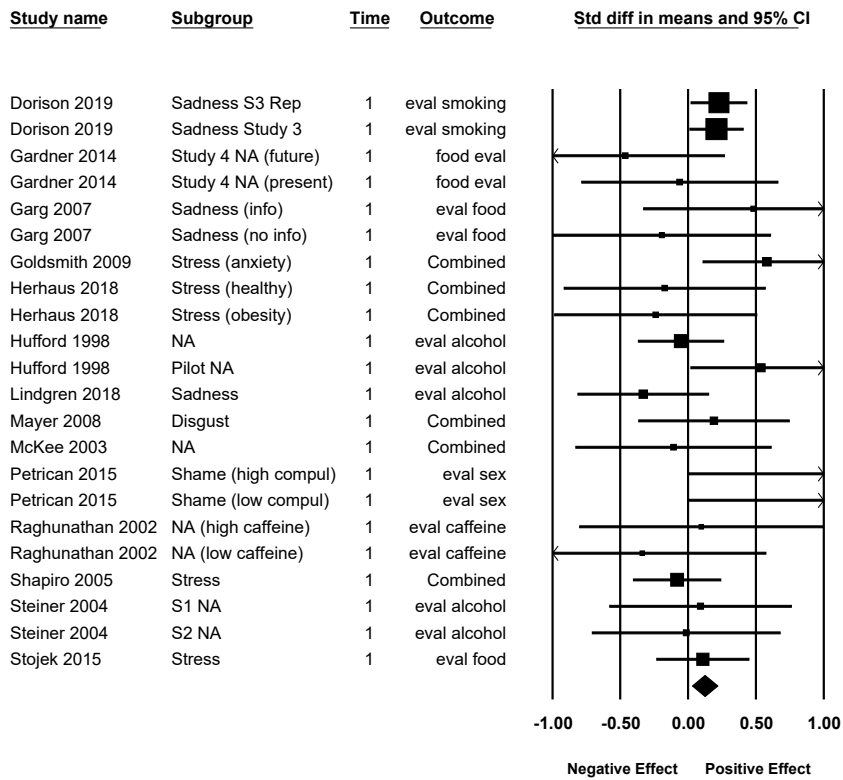

Table S7. Effect sizes for implicit evaluation/ attention outcomes among studies targeting negative affective states

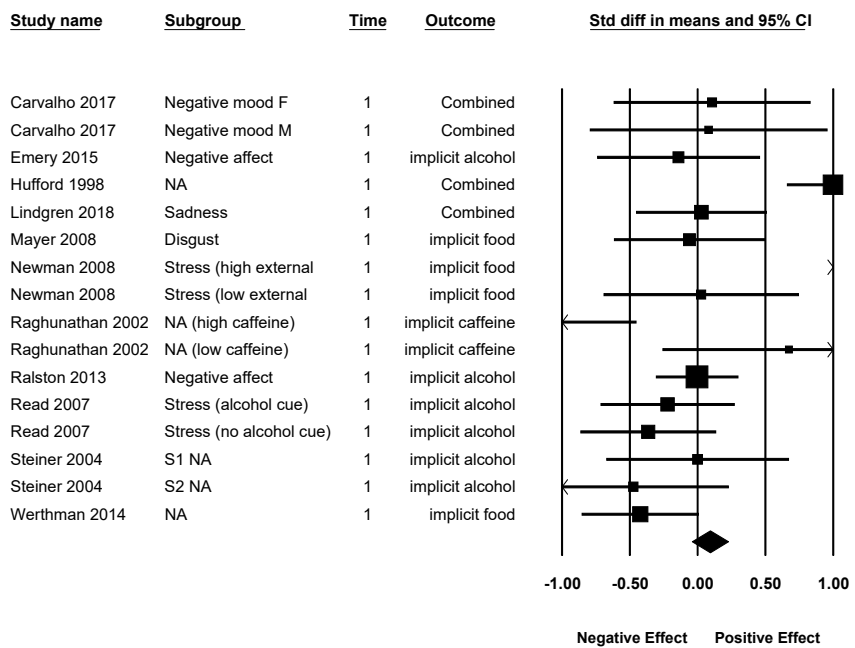

Table S8. Effect sizes for perceived behavioral control outcomes among studies targeting negative affective states

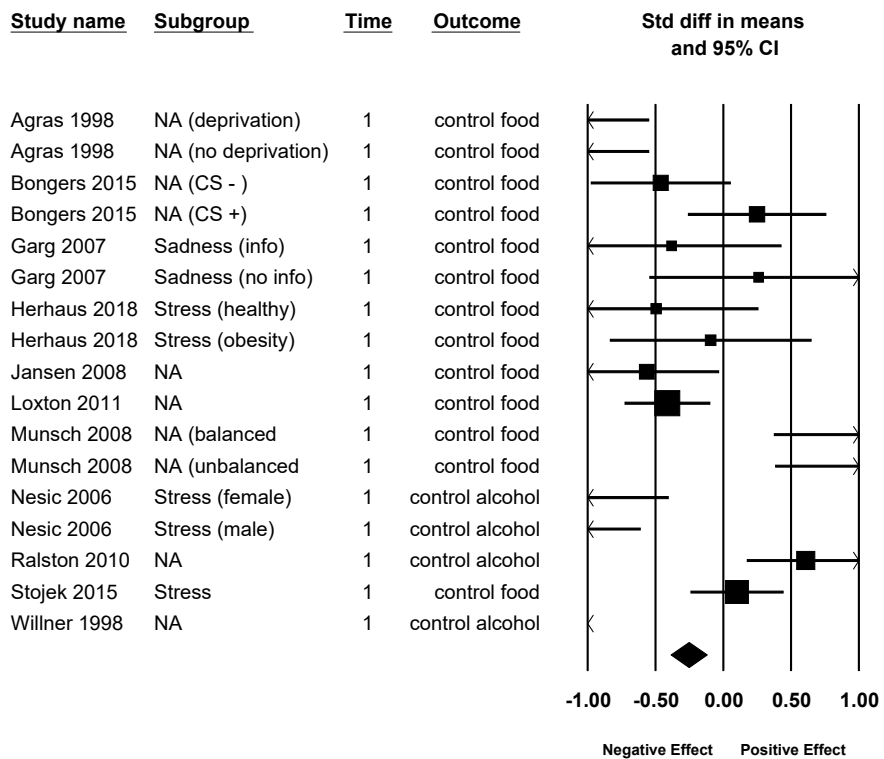

Table S9. Effect sizes for information seeking outcomes among studies targeting negative affective states

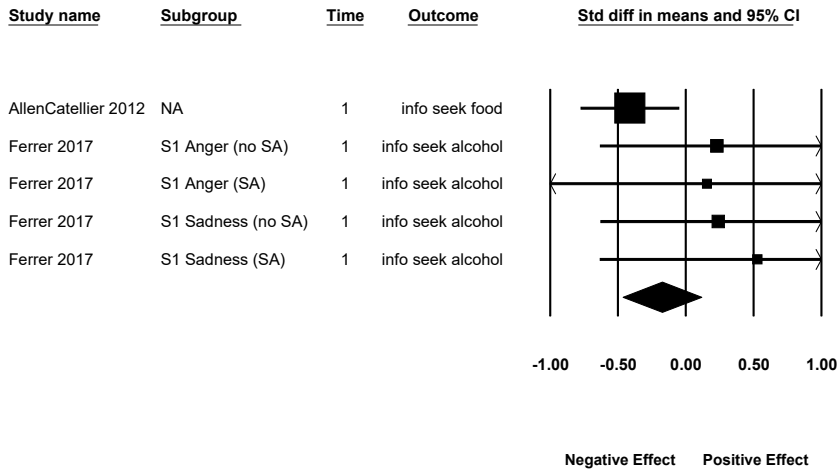

Table S10. Effect sizes for behavior outcomes among studies targeting positive affective states

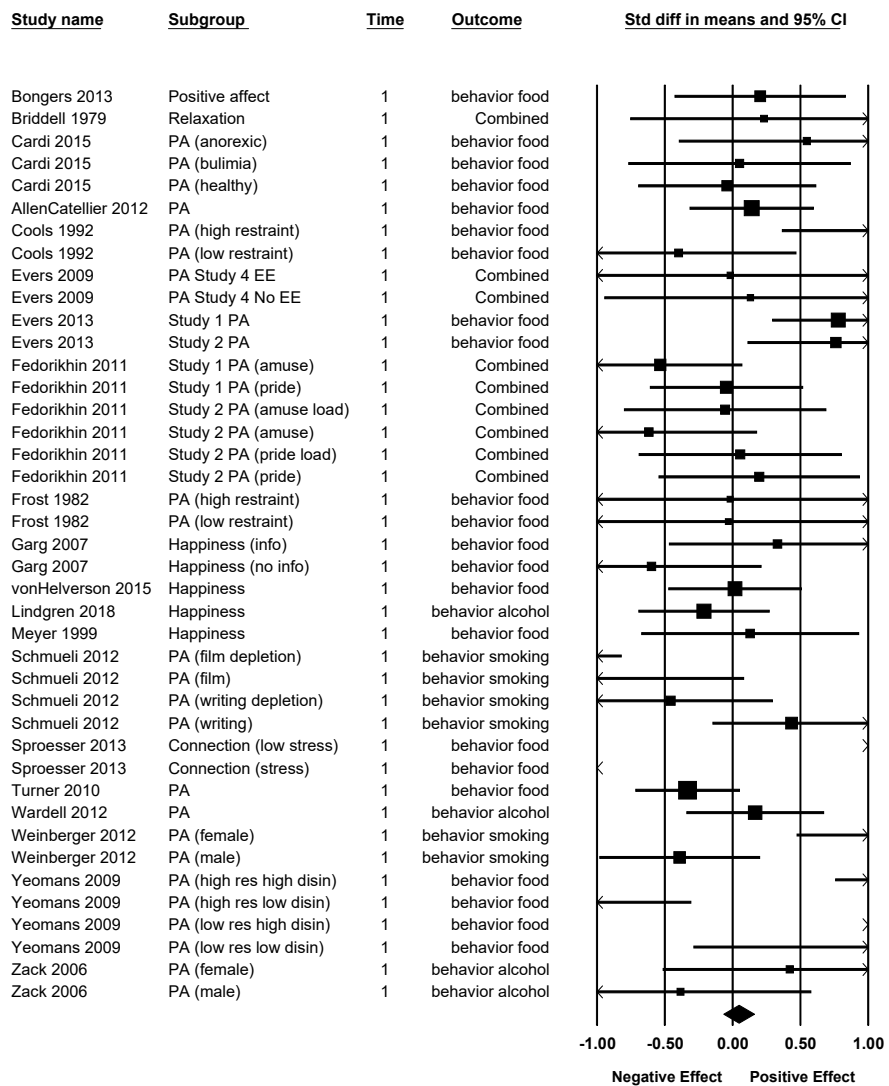



Table S11. Effect sizes for intention outcomes among studies targeting positive affective states

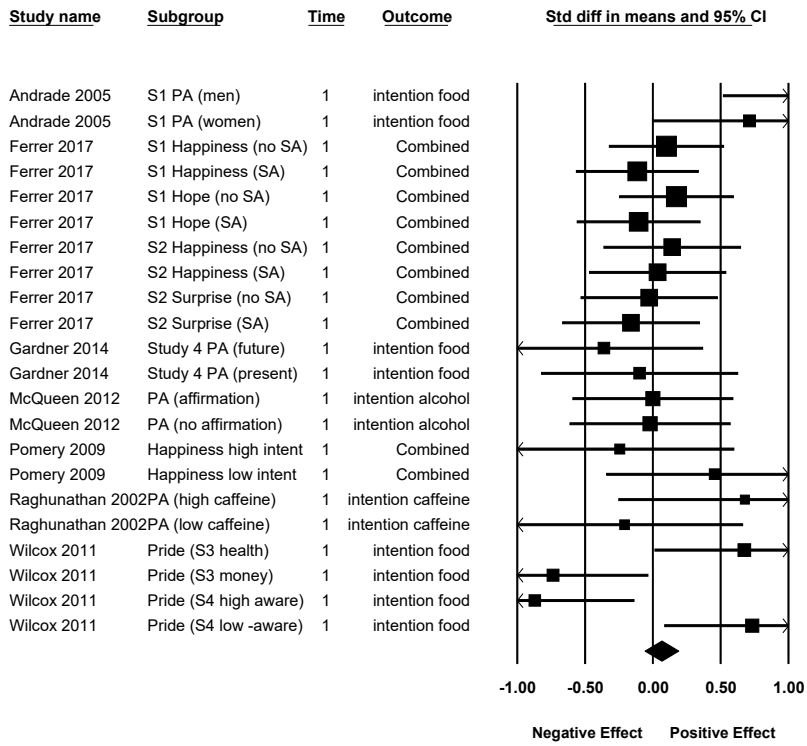

Table S12. Effect sizes for craving outcomes among studies targeting positive affective states

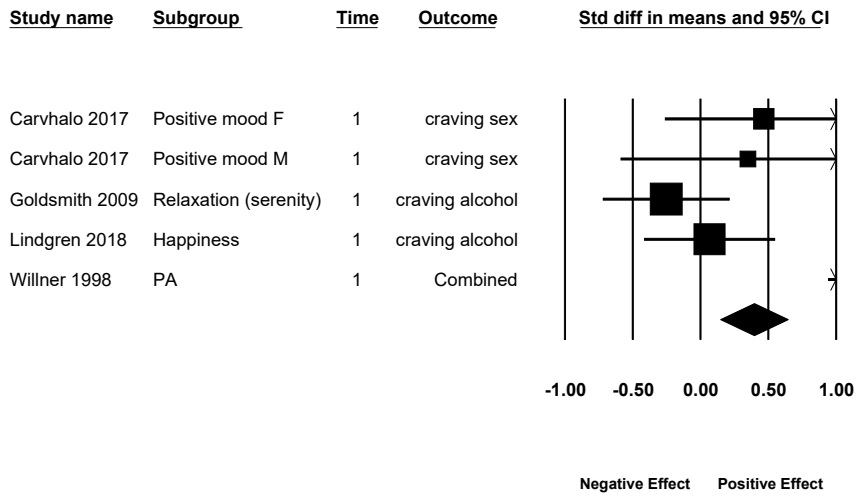

Table S13. Effect sizes for attitude/ evaluation/ expectancy outcomes among studies targeting positive affective states

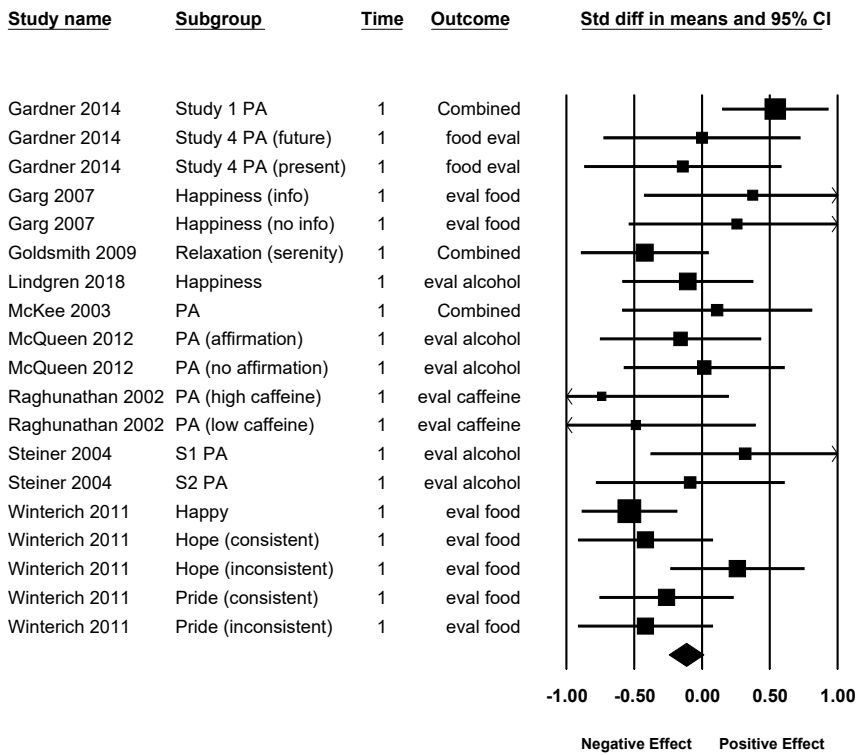

Table S14. Effect sizes for implicit attitude/ attention outcomes among studies targeting positive affective states

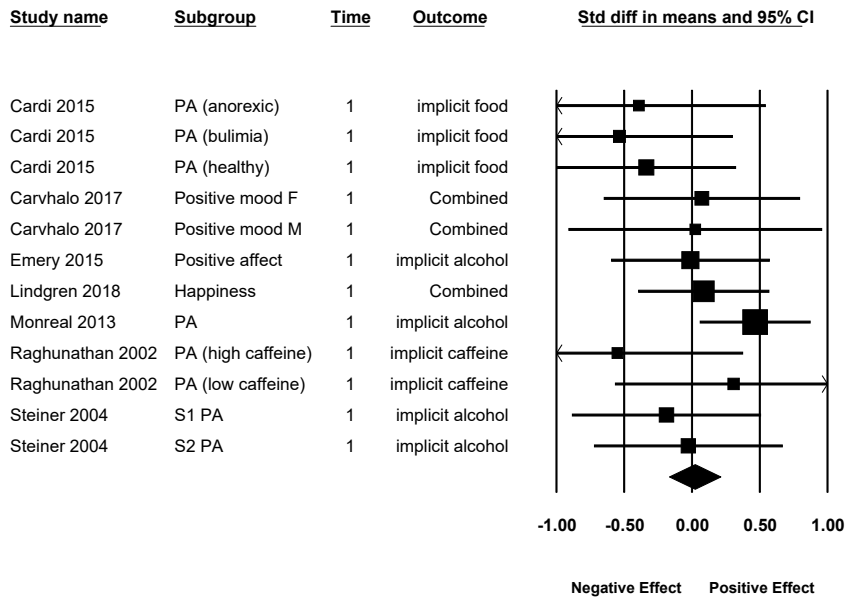

Table S15. Effect sizes for perceived behavioral control outcomes among studies targeting positive affective states

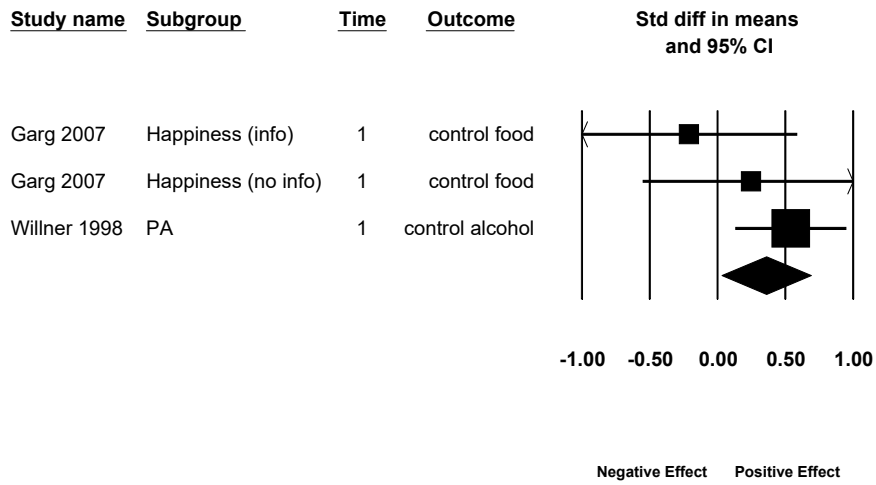

Table S16. Effect sizes for information seeking outcomes among studies targeting positive affective states

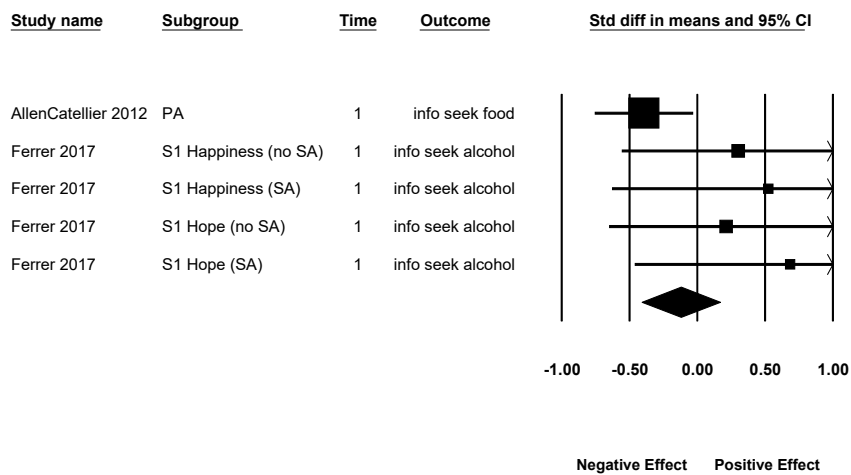

Supplement: NIHMS1727608-supplement-Supplemental_Material_1.pdf [file NIHMS1727608-supplement-Supplemental_Material_1.pdf]
