# Supplementary material
Source: PubMed Central journal article supplement (PMC8406737)
Supplement: NIHMS1727608-supplement-Supplemental_Material_2.pdf [file NIHMS1727608-supplement-Supplemental_Material_2.pdf]

### **Search terms**

Search for: Any Field: ("positive affect" OR emotion OR Mood OR "Affect-as-information" OR ATF OR "Affect infusion model" OR "Broaden and Build" OR valence OR "appraisal tendency" OR stress OR "negative affect" OR Affective OR sad\* OR hap\* OR fear OR anx\* OR ang\* OR grat\* OR pride\* OR disgust\*) AND (Manip\* OR elicit\* OR induct\* OR induced OR incidental OR prime OR priming OR experiment) AND (Judgment OR Decision OR JDM OR "Risk perception" OR "perceived risk" OR willingness OR behavior OR Expectation OR perception OR Attitude OR intentions) AND (Appetitive OR Eat\* OR Food OR Diet\* OR binge OR nutrition OR Tobacco OR Cigarette OR drug OR Smok\* OR alcohol OR drinking OR addict\* OR sex\*) AND Population Group: Human AND Document Type: Dissertation OR Journal Article

### **Supplementary coding information**

Because labeling of affective states by study authors was not always consistent (e.g., two studies using an identical induction are often coded as targeting two different affective states), studies were coded for the affective state targeted, based on the induction procedures and regardless of the way the target affective state was labeled in the original publication. Despite relatively high coder inter-rater reliability on most coded variables, there were relatively large discrepancies in coding for a subset of induction types: music, film, negative false feedback, and Velten. To ensure consistency in the coded affective state, the two lead authors (RF and JT) subsequently returned to the dataset to develop systematic coding rules specifically for these induction types. In 18.5% of instances where the induction was ambiguous (e.g., when a music or film clip or segment could not be identified) and the coders' (RF and JT) best judgment was used to code the target affective state; as such, a separate code was developed for whether the target affective state was ambiguous or unambiguous to code. These authors together reviewed 23 published and unpublished papers (39 inductions) within these categories to develop consensus on these rules. Then, these authors separately coded an additional 10 papers (21 inductions) (including inductions in categories described above, as well as all other induction types) to develop inter-rater reliability ( $kappas > .86$ ). The remainder of the inductions were

coded by a single author (RF).

In most cases, *music* inductions were coded as either positive or negative mood, given that even if the piece was named, it was often impossible to identify the exact segment that was played. For example, a study might specify using only a few minutes of a longer musical piece and the full piece might include both sadness- and anxiety-provoking segments (e.g., Heatherton et al., 1998). There were several exceptions to this rule. First, if participants were asked to bring in a selection of songs that made them feel a particular emotion (e.g., made them “feel sad”), the induction was coded accordingly as a discrete emotion induction (e.g., (Paul Willner et al., 1998)). Moreover, if music was paired with another type of induction, we used the labelling for the other induction. For example, unlabeled music paired with an autobiographical sadness induction was coded as a sadness induction (Bongers, de Graaff, & Jansen, 2016).

*Film* inductions were coded based on the content of the specific clip shown. First, the lead authors determined whether the film clip was included in an article demonstrating the effects of various film clips on discrete emotion states (Gilman et al., 2017). If the clip was not included in this article, the authors coded the study based on their best evaluation of the nature of the film (e.g., comedies were coded as amusement inductions). If the authors were not familiar with the film described, no description of the clip was provided, and it was not possible to watch the film clip to determine the emotion targeted (e.g., because the film was foreign or because the particular clip within the film was not identified), the induction was coded as a positive or negative affective induction. Similarly, if the film or clip employed was such that multiple emotion categories were likely to be targeted, the induction was coded as a positive or negative affective induction.

Inductions in which participants were given negative feedback were coded as stress,

shame, or both depending on parameters of the induction. If participants engaged in a difficult task (e.g., counting backwards or solving problems) and were provided negative feedback on their performance, the induction was coded as both stress and shame. If participants engaged in a task that did not seem particularly difficult, but were provided with negative feedback on their performance at the end of the task, the induction was coded as shame only. If participants engaged in a difficult or impossible task and were not provided any feedback, the induction was excluded from this meta-analysis as being too similar to a cognitive load task (unless the task was paired with another, unambiguous affective induction, such as the speech component of the Trier Social Stress Test).

In most cases, *Velten* inductions were coded as either positive or negative affective inductions, unless additional detail was provided. For example, if the study author included a full list of the modified Velten statements and all were related to sadness (or stress), the induction was coded as a sadness (or stress) induction.

Table S1. Included Studies

| Citation                                                | Affective States (Coded)                                  | Appetitive Risk Behavior | Outcomes                                    |
|---------------------------------------------------------|-----------------------------------------------------------|--------------------------|---------------------------------------------|
| (Agras & Telch, 1998)                                   | Negative Mood                                             | Eating                   | Behavior<br>Perceived Control               |
| (Agrawal & Duhachek, 2010)                              | Guilt<br>Shame                                            | Alcohol Consumption      | Intentions                                  |
| (Allen Catellier, 2012)                                 | Sadness<br>Amusement                                      | Eating                   | Behavior<br>Information Seeking             |
| (Andrade, 2005)                                         | Negative Mood<br>Amusement                                | Eating                   | Intention                                   |
| (Bacon & Engerman, 2018)                                | Stress                                                    | Alcohol Consumption      | Behavior                                    |
| (Bongers, Jansen, Havermans, Roefs, & Nederkoorn, 2013) | Sadness<br>Amusement                                      | Eating                   | Behavior                                    |
| (Bongers, van den Akker, Havermans, & Jansen, 2015)     | Sadness                                                   | Eating                   | Behavior<br>Perceived Control               |
| (Boyer, 1998)                                           | Negative Mood                                             | Eating                   | Behavior                                    |
| (Briddell, Rimm, Caddy, & Dunn, 1979)                   | Contentment<br>Stress                                     | Smoking                  | Behavior                                    |
| (Cardi, Esposito, Clarke, Schifano, & Treasure, 2015)   | Positive Mood                                             | Eating                   | Behavior<br>Implicit Evaluation             |
| (Carvalho, Pereira, Barreto, & Nobre, 2017)             | Sadness<br>Amusement                                      | Sex                      | Craving<br>Implicit Evaluation              |
| (Chan, Van Boven, Andrade, & Ariely, 2014)              | Disgust                                                   | Eating                   | Behavior                                    |
| (Chua, Touyz, & Hill, 2004)                             | Sadness                                                   | Eating                   | Behavior                                    |
| (Cools, Schotte, & McNally, 1992)                       | Fear<br>Amusement                                         | Eating                   | Behavior                                    |
| (Dobbs, Strickler, & Maxwell, 1981)                     | Stress                                                    | Smoking                  | Behavior                                    |
| (Dorison et al., 2019)                                  | Disgust<br>Sadness                                        | Smoking                  | Behavior<br>Craving<br>Attitude/ Evaluation |
| (Dutton, 2017)                                          | Anger                                                     | Alcohol Consumption      | Craving                                     |
| (Emery & Simons, 2015)                                  | Negative Mood<br>Positive Mood                            | Alcohol Consumption      | Implicit Evaluation                         |
| (Emond et al., 2016)                                    | Stress                                                    | Eating                   | Behavior                                    |
| (Evers, Adriaanse, de Ridder, & de Witt Huberts, 2013)  | Sadness<br>Positive Mood                                  | Eating                   | Behavior                                    |
| (Evers, de Ridder, & Adriaanse, 2009)                   | Sadness<br>Shame<br>Pride                                 | Eating                   | Behavior                                    |
| (Evers, Marijn Stok, & de Ridder, 2010)                 | Sadness                                                   | Eating                   | Behavior                                    |
| (Fedorikhin & Patrick, 2010)                            | Amusement<br>Pride                                        | Eating                   | Behavior                                    |
| (Ferrer, Klein, & Graff, 2017)                          | Anger<br>Sadness<br>Fear<br>Happiness<br>Hope<br>Surprise | Alcohol Consumption      | Intentions<br>Information Seeking           |
| (Field & Powell, 2007)                                  | Stress                                                    | Alcohol                  | Craving                                     |
| (Field & Quigley, 2009)                                 | Stress                                                    | Alcohol                  | Craving                                     |
| (Frost, Goolkasian, Ely, & Blanchard, 1982)             | Negative Mood<br>Positive Mood                            | Eating                   | Behavior                                    |
| (Fucito & Juliano, 2009)                                | Sadness                                                   | Smoking                  | Behavior                                    |
| (Gardner & Steinberg, 2005)                             | Sadness                                                   | Eating                   | Intentions                                  |

|                                                       |                                             |                            |                                                                    |
|-------------------------------------------------------|---------------------------------------------|----------------------------|--------------------------------------------------------------------|
|                                                       | Happiness<br>Pride                          |                            | Attitude/ Evaluation                                               |
| (Garg & Lerner, 2013)                                 | Sadness                                     | Eating                     | Behavior                                                           |
| (Garg, Wansink, & Inman, 2007)                        | Sadness<br>Happiness                        | Eating                     | Behavior<br>Perceived Control                                      |
| (Glad & Adesso, 1976)                                 | Stress                                      | Smoking                    | Behavior                                                           |
| (Goldsmith, 2008)                                     | Stress<br>Contentment                       | Alcohol Consumption        | Craving<br>Attitude/ Evaluation                                    |
| (Grunberg & Straub, 1992)                             | Stress                                      | Eating                     | Behavior                                                           |
| (Heatherton, Herman, & Polivy, 1991)                  | Stress                                      | Eating                     | Behavior                                                           |
| (Heatherton, Striepe, & Wittenberg, 1998)             | Negative Mood<br>Guilt<br>Sadness<br>Stress | Eating                     | Behavior                                                           |
| (Herhaus, Päßler, & Petrowski, 2018)                  | Stress                                      | Eating                     | Behavior<br>Attitude/ Evaluation<br>Perceived Control              |
| (Hillebrand, 2000)                                    | Negative Mood                               | Substance Use              | Craving                                                            |
| (Houlihan, 2008)                                      | Stress                                      | Alcohol Consumption<br>Sex | Intentions                                                         |
| (Hufford, 1998)                                       | Negative Mood                               | Alcohol Consumption        | Attitude/ Evaluation<br>Implicit Evaluation                        |
| (Jansen et al., 2008)                                 | Negative Mood                               | Eating                     | Behavior                                                           |
| (Klein, 1996)                                         | Sadness                                     | Eating                     | Behavior                                                           |
| (Larsen, Engels, Granic, & Huizink, 2013)             | Stress                                      | Alcohol Consumption        | Behavior<br>Craving                                                |
| (Lindgren et al., 2018)                               | Positive Mood<br>Sadness                    | Alcohol Consumption        | Behavior<br>Craving<br>Attitude/ Evaluation<br>Implicit Evaluation |
| (Loxton, Dawe, & Cahill, 2011)                        | Negative Mood                               | Eating                     | Perceived Control                                                  |
| (Mayer, Bos, Muris, Huijding, & Vlieland, 2008)       | Disgust                                     | Eating                     | Attitude/ Evaluation<br>Implicit Evaluation                        |
| (McKee, Wall, Hinson, Goldstein, & Bissonnette, 2003) | Negative Mood<br>Positive Mood              | Smoking                    | Attitude/ Evaluation                                               |
| (McQueen, 2003)                                       | Happiness                                   | Alcohol Consumption        | Intentions<br>Attitude/ Evaluation                                 |
| (Meyer & Waller, 1999)                                | Anger<br>Loneliness<br>Happiness            | Eating                     | Behavior                                                           |
| (Monreal, 2012)                                       | Amusement                                   | Alcohol Consumption        | Implicit Evaluation                                                |
| (Morrison, Noel, & Ogle, 2012)                        | Anger                                       | Alcohol Consumption        | Behavior                                                           |
| (Munsch, Michael, Biedert, Meyer, & Margraf, 2008)    | Stress                                      | Eating                     | Behavior<br>Perceived Control                                      |
| (Nesic & Duka, 2006)                                  | Stress                                      | Alcohol Consumption        | Behavior<br>Perceived Control                                      |
| (Newman, O'Connor, & Conner, 2008)                    | Stress                                      | Eating                     | Implicit Evaluation                                                |
| (Persky, Ferrer, & Klein, 2016)                       | Anger<br>Fear                               | Eating                     | Intentions                                                         |
| (Petrican, Burris, & Moscovitch, 2015)                | Shame                                       | Sex                        | Attitude/ Evaluation                                               |
| (Polivy, Herman, & McFarlane, 1994)                   | Stress                                      | Eating                     | Behavior                                                           |
| (Pomery, 2009)                                        | Sadness<br>Happiness                        | Sex                        | Intentions                                                         |
| (Raghunathan & Trope, 2002)                           | Shame                                       | Caffeine Consumption       | Attitude/ Evaluation                                               |

|                                                           |                                |                     |                                                                                          |
|-----------------------------------------------------------|--------------------------------|---------------------|------------------------------------------------------------------------------------------|
|                                                           | Happiness<br>Pride             |                     | Implicit Evaluation                                                                      |
| (Ralston & Palfai, 2010)                                  | Sadness                        | Alcohol             | Perceived Control                                                                        |
| (Read & Curtin, 2007)                                     | Stress                         | Alcohol Consumption | Implicit Evaluation                                                                      |
| (Reznick & Balch, 1977)                                   | Stress                         | Eating              | Behavior                                                                                 |
| (Ridgway & Jeffrey, 1998)                                 | Negative Mood                  | Eating              | Behavior                                                                                 |
| (Rotenberg & Flood, 1999)                                 | Sadness<br>Loneliness          | Eating              | Behavior                                                                                 |
| (Rousseau, Irons, & Correia, 2011)                        | Sadness                        | Alcohol Consumption | Behavior<br>Craving                                                                      |
| (Salerno, Laran, & Janiszewski, 2014)                     | Anger<br>Fear<br>Sadness       | Eating              | Behavior                                                                                 |
| (Scattolon & Nicki, 1995)                                 | Stress                         | Eating              | Behavior                                                                                 |
| (Shapiro & Anderson, 2005)                                | Stress                         | Eating              | Behavior<br>Attitude/ Evaluation                                                         |
| (Shmueli & Prochaska, 2012)                               | Amusement<br>Happiness         | Smoking             | Behavior                                                                                 |
| (Sproesser, Schupp, & Renner, 2014)                       | Shame<br>Pride                 | Eating              | Behavior                                                                                 |
| (Steiner, 2004)                                           | Negative Mood<br>Positive Mood | Alcohol             | Attitude/ Evaluation<br>Implicit<br>Evaluation(Stojek,<br>Fischer, &<br>MacKillop, 2015) |
| (Stojek et al., 2015)                                     | Stress                         | Eating              | Attitude/ Evaluation<br>Perceived Control                                                |
| (Telch & Agras, 1996)                                     | Negative Mood                  | Eating              | Behavior                                                                                 |
| (Thomas, Bacon, Randall, Brady, & See, 2011)              | Stress                         | Alcohol             | Behavior                                                                                 |
| (Thomas, Merrill, von Hofe, & Magid, 2014)                | Stress                         | Alcohol             | Behavior                                                                                 |
| (Trautmann et al., 2018)                                  | Stress                         | Alcohol Consumption | Craving                                                                                  |
| (Turner, Luszczynska, Warner, & Schwarzer, 2010)          | Amusement                      | Eating              | Behavior                                                                                 |
| (Tybur, Bryan, Lieberman, Hooper, & Merriman, 2011)       | Disgust                        | Sex                 | Intentions                                                                               |
| (van Strien, Herman, Anschutz, Engels, & de Weerth, 2012) | Sadness                        | Eating              | Behavior                                                                                 |
| (von Helversen, Amstadt, & Neth, 2015)                    | Anger<br>Amusement             | Eating              | Behavior                                                                                 |
| (Wardell, Read, Curtin, & Merrill, 2012)                  | Negative Mood<br>Positive Mood | Alcohol Consumption | Behavior                                                                                 |
| (Weinberger & McKee, 2011)                                | Negative Mood<br>Positive Mood | Smoking             | Behavior                                                                                 |
| (Werthmann et al., 2014)                                  | Negative Mood                  | Eating              | Behavior                                                                                 |
| (Wilcox, Kramer, & Sen, 2010)                             | Pride                          | Eating              | Intentions                                                                               |
| (Wildes, Marcus, Bright, & Dapelo, 2012)                  | Negative Mood                  | Eating              | Behavior                                                                                 |
| (Willner, Field, Pitts, & Reeve, 1998)                    | Sadness<br>Positive Mood       | Alcohol Consumption | Craving<br>Perceived Control                                                             |
| (Winterich & Haws, 2011)                                  | Hope<br>Pride                  | Eating              | Attitude/ Evaluation                                                                     |
| (Yeomans & Coughlan, 2009)                                | Fear<br>Amusement              | Eating              | Behavior                                                                                 |
| (Zack, Poulos, Aramakis, Khamba, & MacLeod, 2007)         | Stress                         | Alcohol Consumption | Craving                                                                                  |
| (Zack, Poulos, Fragopoulos, Woodford, & MacLeod, 2006)    | Negative Mood<br>Positive Mood | Alcohol Consumption | Behavior                                                                                 |

Table S1. Negative affective states (all) behavior meta-regression

|                                          | <i>k</i>   | <i>d</i>    | 95% <i>CI</i>     | <i>p</i>        | <i>Q</i> | <i>p</i> ( <i>Q</i> ) | <i>I</i> <sup>2</sup> | <i>Tau</i> <sup>2</sup> |
|------------------------------------------|------------|-------------|-------------------|-----------------|----------|-----------------------|-----------------------|-------------------------|
| <i>Overall effect size</i>               | <b>120</b> | <b>0.29</b> | <b>0.13, 0.45</b> | <b>&lt;.001</b> | 622.08   | <.001                 | 80.87                 | 0.58                    |
| <i>Moderators (univariate)</i>           | <i>k</i>   | <i>B</i>    | 95% <i>CI</i>     | <i>p</i>        |          |                       |                       |                         |
| Induction check effect size              | 72         | -0.23       | -0.51, 0.04       | .101            |          |                       |                       |                         |
| Induction check effect size <sup>2</sup> | 72         | 0.40        | 0.09, 0.72        | .013            |          |                       |                       |                         |
| Induction check present                  | 120        | -0.26       | -0.64, 0.13       | .194            |          |                       |                       |                         |
| Ambiguous induction                      | 120        | 0.10        | -0.27, 0.48       | .588            |          |                       |                       |                         |
| Published study                          | 120        | 0.29        | -0.28, 0.86       | .320            |          |                       |                       |                         |
| Participant characteristics              |            |             |                   |                 |          |                       |                       |                         |
| Mean age                                 | 118        | -0.01       | -0.03, 0.02       | .761            |          |                       |                       |                         |
| Percent women                            | 117        | -0.00       | -0.01, 0.00       | .837            |          |                       |                       |                         |
| Percent white                            | 22         | 0.00        | -0.01, 0.01       | .873            |          |                       |                       |                         |
| Percent some college                     | 106        | -0.01       | -0.02, 0.01       | .351            |          |                       |                       |                         |
| Participant at risk                      | <b>120</b> | <b>0.61</b> | <b>0.27, 0.95</b> | <b>&lt;.001</b> |          |                       |                       |                         |
| Procedural details                       |            |             |                   |                 |          |                       |                       |                         |
| Craving state                            | 120        | 0.20        | -0.12, 0.51       | .224            |          |                       |                       |                         |
| Randomization specified                  | 120        | 0.10        | -0.27, 0.47       | .606            |          |                       |                       |                         |
| Participant blinding                     | 120        | 0.21        | -0.13, 0.55       | .224            |          |                       |                       |                         |
| Internet research                        | 120        | -0.23       | -1.82, 1.36       | .776            |          |                       |                       |                         |
| Craving cue present                      | 120        | -0.01       | -0.47, 0.46       | .983            |          |                       |                       |                         |
| Health message                           | 120        | -0.23       | -1.94, 1.47       | .788            |          |                       |                       |                         |
| Induction type                           |            |             |                   |                 |          |                       |                       |                         |
| Autobiographical                         | 120        | -0.25       | -0.63, 0.14       | .208            |          |                       |                       |                         |
| Imagination                              | 120        | 0.10        | -0.41, 0.62       | .692            |          |                       |                       |                         |
| Fabricated situation                     | 120        | 0.26        | -0.30, 0.81       | .367            |          |                       |                       |                         |
| Music                                    | 120        | 0.07        | -0.40, 0.55       | .767            |          |                       |                       |                         |
| Pictures                                 | 120        | 0.33        | -0.88, 1.55       | .593            |          |                       |                       |                         |
| Priming                                  | 120        | 0.30        | -0.59, 1.19       | .508            |          |                       |                       |                         |
| Reading                                  | 120        | -0.13       | -0.68, 0.43       | .659            |          |                       |                       |                         |
| Trier (speech)                           | 120        | -0.11       | -0.58, 0.36       | .645            |          |                       |                       |                         |
| Trier (cognitive)                        | 120        | -0.21       | -0.67, 0.25       | .366            |          |                       |                       |                         |
| Velten                                   | 120        | -0.36       | -0.84, 0.21       | .235            |          |                       |                       |                         |
| Video                                    | 120        | 0.31        | -0.08, 0.71       | .122            |          |                       |                       |                         |
| Multiple induction types                 | 120        | -0.08       | -0.44, 0.28       | .654            |          |                       |                       |                         |
| Appetitive behavior                      |            |             |                   |                 |          |                       |                       |                         |
| Eating                                   | 120        | -0.26       | -0.62, 0.11       | .168            |          |                       |                       |                         |
| Alcohol                                  | 120        | -0.01       | -0.47, 0.45       | .976            |          |                       |                       |                         |
| Smoking                                  | 120        | 0.46        | -0.02, 0.94       | .062            |          |                       |                       |                         |
| Sex                                      | 120        | 0.06        | -1.63, 1.76       | .943            |          |                       |                       |                         |
| Outcome characteristics                  |            |             |                   |                 |          |                       |                       |                         |
| Hedonic outcome                          | 120        | -0.47       | -0.99, 0.04       | .072            |          |                       |                       |                         |
| Public outcome                           | 120        | -0.03       | -0.24, 0.19       | .817            |          |                       |                       |                         |
| Self-reported outcome                    | 120        | -0.53       | -1.36, 0.30       | .212            |          |                       |                       |                         |
| Affective state                          |            |             |                   |                 |          |                       |                       |                         |
| Anger                                    | 120        | 0.08        | -0.64, 0.79       | .834            |          |                       |                       |                         |
| Disgust                                  | 120        | -0.71       | -2.27, 0.85       | .372            |          |                       |                       |                         |
| Fear                                     | 120        | 0.15        | -0.75, 1.05       | .744            |          |                       |                       |                         |
| Guilt                                    | 120        | 0.29        | -1.34, 1.93       | .726            |          |                       |                       |                         |
| Loneliness                               | 120        | 0.06        | -1.04, 1.16       | .910            |          |                       |                       |                         |
| Sadness                                  | 120        | -0.29       | -0.64, 0.05       | .098            |          |                       |                       |                         |
| Shame                                    | 120        | -0.33       | -1.08, 0.41       | .380            |          |                       |                       |                         |

Table S2. Negative affective states (all) intentions meta-regression

|                                          | <i>k</i> | <i>d</i> | 95% CI       | <i>p</i> | <i>Q</i> | <i>p</i> ( <i>Q</i> ) | <i>I</i> <sup>2</sup> | <i>Tau</i> <sup>2</sup> |
|------------------------------------------|----------|----------|--------------|----------|----------|-----------------------|-----------------------|-------------------------|
| Overall effect size                      | 25       | 0.06     | -0.04, 0.16  | .208     | 29.22    | .212                  | 17.87                 | 0.01                    |
| Moderators (univariate)                  | <i>k</i> | <i>B</i> | 95% CI       | <i>p</i> |          |                       |                       |                         |
| Induction check effect size              | 15       | 0.11     | -0.20, 0.41  | .490     |          |                       |                       |                         |
| Induction check effect size <sup>2</sup> | 15       | 0.16     | -0.43, 0.75  | .594     |          |                       |                       |                         |
| Induction check present                  | 25       | -0.01    | -0.25, 0.22  | .901     |          |                       |                       |                         |
| Ambiguous induction                      | 25       | -0.14    | -0.56, 0.28  | .501     |          |                       |                       |                         |
| Published study                          | 25       | -0.06    | -0.45, 0.33  | .773     |          |                       |                       |                         |
| Participant characteristics              |          |          |              |          |          |                       |                       |                         |
| Mean age                                 | 25       | -0.00    | -0.01, 0.01  | .520     |          |                       |                       |                         |
| Percent women                            | 18       | 0.00     | -0.00, 0.01  | .283     |          |                       |                       |                         |
| Percent white                            | -        | -        | -            | -        |          |                       |                       |                         |
| Percent some college                     | 16       | -0.00    | -0.00, 0.00  | .737     |          |                       |                       |                         |
| Participant at risk                      | 25       | -0.45    | -1.38, 0.49  | .348     |          |                       |                       |                         |
| Procedural details                       |          |          |              |          |          |                       |                       |                         |
| Craving state                            | 25       | 0.10     | -0.44, 0.65  | .712     |          |                       |                       |                         |
| Randomization specified                  | 25       | -0.07    | -0.30, 0.16  | .560     |          |                       |                       |                         |
| Participant blinding                     | 25       | -0.09    | -0.34, 0.15  | .449     |          |                       |                       |                         |
| Internet research                        | 25       | 0.03     | -0.17, 0.24  | .741     |          |                       |                       |                         |
| Craving cue present                      | 25       | -0.03    | -0.56, 0.50  | .903     |          |                       |                       |                         |
| Health message                           | 25       | 0.11     | -0.14, 0.37  | .368     |          |                       |                       |                         |
| Induction type                           |          |          |              |          |          |                       |                       |                         |
| Autobiographical                         | 25       | 0.34     | 0.06, 0.62   | .019     |          |                       |                       |                         |
| Imagination                              | -        | -        | -            | -        |          |                       |                       |                         |
| Fabricated situation                     | -        | -        | -            | -        |          |                       |                       |                         |
| Music                                    | 25       | 0.30     | -0.32, 0.91  | .343     |          |                       |                       |                         |
| Pictures                                 | -        | -        | -            | -        |          |                       |                       |                         |
| Priming                                  | -        | -        | -            | -        |          |                       |                       |                         |
| Reading                                  | -        | -        | -            | -        |          |                       |                       |                         |
| Trier (speech)                           | 25       | -0.10    | -0.59, 0.39  | .694     |          |                       |                       |                         |
| Trier (cognitive)                        | 25       | -0.31    | -0.97, 0.35  | .362     |          |                       |                       |                         |
| Velten                                   | -        | -        | -            | -        |          |                       |                       |                         |
| Video                                    | 25       | -0.03    | -0.56, 0.50  | .903     |          |                       |                       |                         |
| Multiple induction types                 | 25       | 0.27     | -0.01, 0.56  | .059     |          |                       |                       |                         |
| Appetitive behavior                      |          |          |              |          |          |                       |                       |                         |
| Eating                                   | 25       | 0.06     | -0.16, 0.27  | .602     |          |                       |                       |                         |
| Alcohol                                  | 25       | 0.04     | -0.16, 0.25  | .695     |          |                       |                       |                         |
| Smoking                                  | -        | -        | -            | -        |          |                       |                       |                         |
| Sex                                      | 25       | -0.19    | -0.49, 0.11  | .205     |          |                       |                       |                         |
| Outcome characteristics                  |          |          |              |          |          |                       |                       |                         |
| Hedonic outcome                          | 25       | -0.06    | -0.29, 0.18  | .648     |          |                       |                       |                         |
| Affective state                          |          |          |              |          |          |                       |                       |                         |
| Negative mood                            | 25       | -0.03    | -0.56, 0.50  | .903     |          |                       |                       |                         |
| Stress                                   | 25       | -0.10    | -0.59, 0.39  | .694     |          |                       |                       |                         |
| Anger                                    | 25       | 0.03     | -0.20, 0.26  | .796     |          |                       |                       |                         |
| Disgust                                  | 25       | -0.51    | -0.92, -0.09 | .016     |          |                       |                       |                         |
| Fear                                     | 25       | -0.03    | -0.30, 0.23  | .807     |          |                       |                       |                         |
| Guilt                                    | 25       | 0.02     | -0.31, 0.35  | .909     |          |                       |                       |                         |
| Sadness                                  | 25       | 0.12     | -0.13, 0.37  | .357     |          |                       |                       |                         |
| Shame                                    | 25       | 0.06     | -0.24, 0.36  | .384     |          |                       |                       |                         |



Table S3. Negative affective states (all) craving meta-regression

|                                          | <i>k</i>  | <i>d</i>     | 95% <i>CI</i>       | <i>p</i>        | <i>Q</i> | <i>p (Q)</i> | <i>I</i> <sup>2</sup> | <i>Tau</i> <sup>2</sup> |
|------------------------------------------|-----------|--------------|---------------------|-----------------|----------|--------------|-----------------------|-------------------------|
| <i>Overall effect size</i>               | 31        | 0.29         | 0.00, 0.58          | .049            | 188.34   | <.001        | 84.07                 | 0.50                    |
| <i>Moderators (univariate)</i>           | <i>k</i>  | <i>B</i>     | 95% <i>CI</i>       | <i>p</i>        |          |              |                       |                         |
| Induction check effect size              | 14        | -0.12        | -0.42, 0.17         | .409            |          |              |                       |                         |
| Induction check effect size <sup>2</sup> | 14        | 0.22         | -0.06, 0.50         | .127            |          |              |                       |                         |
| Induction check present                  | 31        | 0.55         | -0.13, 1.23         | .113            |          |              |                       |                         |
| Ambiguous induction                      | 31        | 0.03         | -0.92, 0.98         | .951            |          |              |                       |                         |
| Published study                          | 31        | 0.12         | -0.70, 0.94         | .780            |          |              |                       |                         |
| Participant characteristics              |           |              |                     |                 |          |              |                       |                         |
| Mean age                                 | 28        | 0.09         | -0.02, 0.20         | .102            |          |              |                       |                         |
| Percent women                            | 29        | -0.01        | -0.01, 0.00         | .212            |          |              |                       |                         |
| Percent white                            | 7         | 0.00         | -0.02, 0.02         | .711            |          |              |                       |                         |
| Percent some college                     | 22        | 0.05         | -0.43, 0.53         | .830            |          |              |                       |                         |
| Participant at risk                      | 31        | 0.12         | -0.51, 0.75         | .699            |          |              |                       |                         |
| Procedural details                       |           |              |                     |                 |          |              |                       |                         |
| Craving state                            | 31        | 0.22         | -0.47, 0.90         | .532            |          |              |                       |                         |
| Randomization specified                  | <b>31</b> | <b>-2.97</b> | <b>-4.13, -1.82</b> | <b>&lt;.001</b> |          |              |                       |                         |
| Participant blinding                     | 31        | -0.24        | -0.84, 0.36         | .438            |          |              |                       |                         |
| Internet research                        | -         | -            | -                   | -               |          |              |                       |                         |
| Craving cue present                      | 31        | -0.38        | -1.23, 0.47         | .384            |          |              |                       |                         |
| Health message                           | -         | -            | -                   | -               |          |              |                       |                         |
| Induction type                           |           |              |                     |                 |          |              |                       |                         |
| Autobiographical                         | 31        | -0.39        | -1.23, 0.45         | .367            |          |              |                       |                         |
| Imagination                              | 31        | -0.32        | -1.87, 1.22         | .682            |          |              |                       |                         |
| Fabricated situation                     | -         | -            | -                   | -               |          |              |                       |                         |
| Music                                    | <b>31</b> | <b>2.97</b>  | <b>1.82, 4.13</b>   | <b>&lt;.001</b> |          |              |                       |                         |
| Pictures                                 | 31        | 0.30         | -1.35, 1.96         | .720            |          |              |                       |                         |
| Priming                                  | -         | -            | -                   | -               |          |              |                       |                         |
| Reading                                  | -         | -            | -                   | -               |          |              |                       |                         |
| Trier (speech)                           | 31        | -0.24        | -0.84, 0.36         | .438            |          |              |                       |                         |
| Trier (cognitive)                        | 31        | -0.37        | -1.94, 1.21         | .649            |          |              |                       |                         |
| Velten                                   | -         | -            | -                   | -               |          |              |                       |                         |
| Video                                    | 31        | 0.45         | -0.69, 1.58         | .441            |          |              |                       |                         |
| Multiple induction types                 | 31        | -0.21        | -1.04, 0.63         | .623            |          |              |                       |                         |
| Appetitive behavior                      |           |              |                     |                 |          |              |                       |                         |
| Eating                                   | -         | -            | -                   | -               |          |              |                       |                         |
| Alcohol                                  | 31        | 0.12         | -0.66, 0.90         | .756            |          |              |                       |                         |
| Smoking                                  | 31        | -0.31        | -1.41, 0.79         | .579            |          |              |                       |                         |
| Sex                                      | 31        | -0.07        | -1.26, 1.12         | .911            |          |              |                       |                         |
| Outcome characteristics                  |           |              |                     |                 |          |              |                       |                         |
| Hedonic outcome                          | -         | -            | -                   | -               |          |              |                       |                         |
| Affective state                          |           |              |                     |                 |          |              |                       |                         |
| Negative affect                          | 31        | 0.30         | -1.35, 1.96         | .720            |          |              |                       |                         |
| Stress                                   | 31        | -0.14        | -0.77, 0.48         | .651            |          |              |                       |                         |
| Anger                                    | 31        | -0.32        | -1.87, 1.22         | .682            |          |              |                       |                         |
| Disgust                                  | 31        | -0.65        | -21.3, 0.82         | .384            |          |              |                       |                         |
| Sadness                                  | 31        | 0.33         | -0.36, 1.02         | .344            |          |              |                       |                         |

Table S4. Negative affective states (all) implicit evaluations/ attention meta-regression

|                                          | <i>k</i>  | <i>d</i>     | 95% <i>CI</i>       | <i>p</i>    | <i>Q</i> | <i>p</i> ( <i>Q</i> ) | <i>I</i> <sup>2</sup> | <i>Tau</i> <sup>2</sup> |
|------------------------------------------|-----------|--------------|---------------------|-------------|----------|-----------------------|-----------------------|-------------------------|
| Overall effect size                      | 16        | 0.05         | -0.26, 0.36         | .763        | 72.48    | <.001                 | 79.30                 | 0.29                    |
| Moderators (univariate)                  | <i>k</i>  | <i>B</i>     | 95% <i>CI</i>       | <i>p</i>    |          |                       |                       |                         |
| Induction check effect size              | 11        | -            | -                   | -           |          |                       |                       |                         |
| Induction check effect size <sup>2</sup> | 11        | -            | -                   | -           |          |                       |                       |                         |
| Induction check present                  | 16        | 0.44         | -0.62, 1.51         | .415        |          |                       |                       |                         |
| Ambiguous induction                      | 16        | -0.47        | -1.19, 0.25         | .198        |          |                       |                       |                         |
| Published study                          | 16        | 0.32         | -0.64, 1.28         | .515        |          |                       |                       |                         |
| Participant characteristics              |           |              |                     |             |          |                       |                       |                         |
| Mean age                                 | 16        | 0.02         | -0.06, 0.09         | .594        |          |                       |                       |                         |
| Percent women                            | 15        | -0.00        | -0.01, 0.01         | .917        |          |                       |                       |                         |
| Percent white                            | 6         | -            | -                   | -           |          |                       |                       |                         |
| Percent some college                     | -         | -            | -                   | -           |          |                       |                       |                         |
| Participant at risk                      | 16        | 0.19         | -0.67, 1.05         | .666        |          |                       |                       |                         |
| Procedural details                       |           |              |                     |             |          |                       |                       |                         |
| Craving state                            | -         | -            | -                   | -           |          |                       |                       |                         |
| Randomization specified                  | 16        | -0.47        | -1.21, 0.28         | .220        |          |                       |                       |                         |
| Participant blinding                     | 16        | -0.07        | -0.73, 0.58         | .832        |          |                       |                       |                         |
| Internet research                        | -         | -            | -                   | -           |          |                       |                       |                         |
| Craving cue present                      | 16        | -0.51        | -1.70, 0.69         | .406        |          |                       |                       |                         |
| Health message                           | 16        | -0.44        | -1.51, 0.62         | .415        |          |                       |                       |                         |
| Induction type                           |           |              |                     |             |          |                       |                       |                         |
| Autobiographical                         | 16        | -0.5         | -1.71, 0.69         | .406        |          |                       |                       |                         |
| Imagination                              | -         | -            | -                   | -           |          |                       |                       |                         |
| Fabricated situation                     | 16        | -0.39        | -1.29, 0.50         | .386        |          |                       |                       |                         |
| Music                                    | 16        | -0.03        | -0.71, 0.64         | .924        |          |                       |                       |                         |
| Pictures                                 | 16        | 0.52         | -0.26, 1.30         | .190        |          |                       |                       |                         |
| Priming                                  | -         | -            | -                   | -           |          |                       |                       |                         |
| Reading                                  | -         | -            | -                   | -           |          |                       |                       |                         |
| Trier (speech)                           | 16        | 0.28         | -0.46, 1.06         | .457        |          |                       |                       |                         |
| Trier (cognitive)                        | 16        | -0.44        | -1.51, 0.62         | .415        |          |                       |                       |                         |
| Velten                                   | 16        | -0.32        | -1.28, 0.64         | .515        |          |                       |                       |                         |
| Video                                    | 16        | 0.00         | -0.75, 0.75         | .999        |          |                       |                       |                         |
| Multiple induction types                 | 16        | -0.22        | -0.87, 0.43         | .509        |          |                       |                       |                         |
| Appetitive behavior                      |           |              |                     |             |          |                       |                       |                         |
| Eating                                   | 16        | 0.31         | -0.43, 1.05         | .407        |          |                       |                       |                         |
| Alcohol                                  | 16        | -0.10        | -0.74, 0.54         | .751        |          |                       |                       |                         |
| Smoking                                  | -         | -            | -                   | -           |          |                       |                       |                         |
| Sex                                      | 16        | 0.05         | -0.96, 1.06         | .917        |          |                       |                       |                         |
| Outcome characteristics                  |           |              |                     |             |          |                       |                       |                         |
| Hedonic outcome                          | <b>16</b> | <b>-0.98</b> | <b>-1.92, -0.04</b> | <b>.041</b> |          |                       |                       |                         |
| Affective state                          |           |              |                     |             |          |                       |                       |                         |
| Negative mood                            | 16        | -0.03        | -0.71, 0.64         | .924        |          |                       |                       |                         |
| Stress                                   | 16        | 0.28         | -0.46, 1.02         | .457        |          |                       |                       |                         |
| Disgust                                  | 16        | -0.11        | -1.39, 1.16         | .861        |          |                       |                       |                         |
| Sadness                                  | 16        | 0.00         | -0.75, 0.75         | .999        |          |                       |                       |                         |
| Shame                                    | 16        | -0.44        | -1.51, 0.62         | .415        |          |                       |                       |                         |

Table S5. Negative affective states (all) perceived behavioral control meta-regression

|                                          | <i>k</i> | <i>d</i> | 95% <i>CI</i> | <i>p</i> | <i>Q</i> | <i>p</i> ( <i>Q</i> ) | <i>I</i> <sup>2</sup> | <i>Tau</i> <sup>2</sup> |
|------------------------------------------|----------|----------|---------------|----------|----------|-----------------------|-----------------------|-------------------------|
| Overall effect size                      | 17       | -0.34    | -0.73, 0.04   | .076     | 118.13   | <.001                 | 86.46                 | 0.52                    |
| Moderators (univariate)                  | <i>k</i> | <i>B</i> | 95% <i>CI</i> | <i>p</i> |          |                       |                       |                         |
| Induction check effect size              | 11       | -        | -             | -        |          |                       |                       |                         |
| Induction check effect size <sup>2</sup> | 11       | -        | -             | -        |          |                       |                       |                         |
| Induction check present                  | -        | -        | -             | -        |          |                       |                       |                         |
| Ambiguous induction                      | 17       | -0.70    | -1.59, 0.20   | .126     |          |                       |                       |                         |
| Published study                          | -        | -        | -             | -        |          |                       |                       |                         |
| Participant characteristics              |          |          |               |          |          |                       |                       |                         |
| Mean age                                 | 17       | -0.00    | -0.05, 0.05   | .902     |          |                       |                       |                         |
| Percent women                            | 15       | 0.01     | -0.01, 0.02   | .408     |          |                       |                       |                         |
| Percent white                            | -        | -        | -             | -        |          |                       |                       |                         |
| Percent some college                     | 11       | -        | -             | -        |          |                       |                       |                         |
| Participant at risk                      | 17       | -0.38    | -1.39, 0.64   | .468     |          |                       |                       |                         |
| Procedural details                       |          |          |               |          |          |                       |                       |                         |
| Craving state                            | 17       | -0.22    | -1.14, 0.70   | .636     |          |                       |                       |                         |
| Randomization specified                  | 17       | 1.38     | 0.06, 2.70    | .040     |          |                       |                       |                         |
| Participant blinding                     | 17       | 0.34     | -0.58, 1.27   | .465     |          |                       |                       |                         |
| Internet research                        | -        | -        | -             | -        |          |                       |                       |                         |
| Craving cue present                      | 17       | 0.99     | 0.26, 1.71    | .008     |          |                       |                       |                         |
| Health message                           | 17       | -0.04    | -1.74, 1.67   | .967     |          |                       |                       |                         |
| Induction type                           |          |          |               |          |          |                       |                       |                         |
| Autobiographical                         | 17       | 0.41     | -0.37, 1.19   | .299     |          |                       |                       |                         |
| Imagination                              | -        | -        | -             | -        |          |                       |                       |                         |
| Fabricated situation                     | -        | -        | -             | -        |          |                       |                       |                         |
| Music                                    | 17       | -0.35    | -1.21, 0.50   | .418     |          |                       |                       |                         |
| Pictures                                 | -        | -        | -             | -        |          |                       |                       |                         |
| Priming                                  | -        | -        | -             | -        |          |                       |                       |                         |
| Reading                                  | -        | -        | -             | -        |          |                       |                       |                         |
| Trier (speech)                           | 17       | -0.67    | -1.63, 0.28   | .165     |          |                       |                       |                         |
| Trier (cognitive)                        | 17       | -0.67    | -1.63, 0.28   | .165     |          |                       |                       |                         |
| Velten                                   | -        | -        | -             | -        |          |                       |                       |                         |
| Video                                    | 17       | 0.49     | -0.44, 1.42   | .302     |          |                       |                       |                         |
| Multiple induction types                 | 17       | -0.39    | -1.19, 0.42   | .344     |          |                       |                       |                         |
| Appetitive behavior                      |          |          |               |          |          |                       |                       |                         |
| Eating                                   | 17       | 0.80     | -0.14, 1.72   | .098     |          |                       |                       |                         |
| Alcohol                                  | 17       | -0.80    | -1.72, 0.15   | .098     |          |                       |                       |                         |
| Smoking                                  | -        | -        | -             | -        |          |                       |                       |                         |
| Sex                                      |          |          |               |          |          |                       |                       |                         |
| Outcome characteristics                  |          |          |               |          |          |                       |                       |                         |
| Hedonic outcome                          | 17       | 0.60     | -0.30, 1.50   | .194     |          |                       |                       |                         |
| Affective state                          |          |          |               |          |          |                       |                       |                         |
| Negative affect                          | 17       | -0.70    | -1.59, 0.20   | .126     |          |                       |                       |                         |
| Stress                                   | 17       | 0.37     | -0.41, 1.15   | .353     |          |                       |                       |                         |
| Sadness                                  | 17       | 0.18     | -0.65, 1.01   | .665     |          |                       |                       |                         |

Table S6. Negative mood behavior meta-regression

|                                          | <i>k</i>  | <i>d</i>    | 95% <i>CI</i>     | <i>p</i>    | <i>Q</i> | <i>p</i> ( <i>Q</i> ) | <i>I</i> <sup>2</sup> | <i>Tau</i> <sup>2</sup> |
|------------------------------------------|-----------|-------------|-------------------|-------------|----------|-----------------------|-----------------------|-------------------------|
| <i>Overall effect size</i>               | 26        | 0.30        | 0.04, 0.57        | .023        | 71.79    | <.001                 | 65.18                 | 0.28                    |
| <i>Moderators (univariate)</i>           | <i>k</i>  | <i>B</i>    | 95% <i>CI</i>     | <i>p</i>    |          |                       |                       |                         |
| Induction check effect size              | 22        | -0.06       | -0.47, 0.36       | .790        |          |                       |                       |                         |
| Induction check effect size <sup>2</sup> | 22        | 0.13        | -0.42, 0.67       | .650        |          |                       |                       |                         |
| Induction check present                  | 26        | -0.25       | -1.30, 0.81       | .646        |          |                       |                       |                         |
| Ambiguous induction                      | 26        | 0.03        | -0.64, 0.70       | .936        |          |                       |                       |                         |
| Published study                          | 26        | -0.24       | -1.16, 0.68       | .609        |          |                       |                       |                         |
| Participant characteristics              |           |             |                   |             |          |                       |                       |                         |
| Mean age                                 | 26        | -0.01       | -0.04, 0.02       | .435        |          |                       |                       |                         |
| Percent women                            | 26        | -0.00       | -0.01, 0.01       | .836        |          |                       |                       |                         |
| Percent white                            | 6         | -           | -                 | -           |          |                       |                       |                         |
| Percent some college                     | 21        | -0.02       | -0.05, 0.01       | .231        |          |                       |                       |                         |
| Participant at risk                      | 26        | -0.05       | -0.59, 0.49       | .856        |          |                       |                       |                         |
| Procedural details                       |           |             |                   |             |          |                       |                       |                         |
| Craving state                            | 26        | -0.50       | -1.02, 0.02       | .059        |          |                       |                       |                         |
| Randomization specified                  | 26        | 0.37        | -0.44, 1.18       | .386        |          |                       |                       |                         |
| Participant blinding                     | 26        | 0.32        | -0.21, 0.84       | .240        |          |                       |                       |                         |
| Internet research                        | -         | -           | -                 | -           |          |                       |                       |                         |
| Craving cue present                      | -         | -           | -                 | -           |          |                       |                       |                         |
| Health message                           | -         | -           | -                 | -           |          |                       |                       |                         |
| Induction type                           |           |             |                   |             |          |                       |                       |                         |
| Autobiographical                         | 26        | -0.37       | -0.81, 0.17       | .178        |          |                       |                       |                         |
| Imagination                              | -         | -           | -                 | -           |          |                       |                       |                         |
| Fabricated situation                     | -         | -           | -                 | -           |          |                       |                       |                         |
| Music                                    | 26        | 0.26        | -0.27, 0.80       | .340        |          |                       |                       |                         |
| Pictures                                 | -         | -           | -                 | -           |          |                       |                       |                         |
| Priming                                  | 26        | 0.25        | -0.81, 1.30       | .646        |          |                       |                       |                         |
| Reading                                  | -         | -           | -                 | -           |          |                       |                       |                         |
| Trier (speech)                           | -         | -           | -                 | -           |          |                       |                       |                         |
| Trier (cognitive)                        | -         | -           | -                 | -           |          |                       |                       |                         |
| Velten                                   | 26        | -0.16       | -0.74, 0.41       | .579        |          |                       |                       |                         |
| Video                                    | 26        | -0.06       | -1.41, 1.30       | .936        |          |                       |                       |                         |
| Multiple induction types                 | 26        | -0.24       | -0.89, 0.40       | .460        |          |                       |                       |                         |
| Appetitive behavior                      |           |             |                   |             |          |                       |                       |                         |
| Eating                                   | 26        | -0.53       | -1.13, 0.06       | .079        |          |                       |                       |                         |
| Alcohol                                  | 26        | 0.08        | -0.66, 0.81       | .835        |          |                       |                       |                         |
| Smoking                                  | <b>26</b> | <b>0.81</b> | <b>0.06, 1.55</b> | <b>.033</b> |          |                       |                       |                         |
| Sex                                      | 26        | 0.05        | -1.31, 1.40       | .948        |          |                       |                       |                         |
| Outcome characteristics                  |           |             |                   |             |          |                       |                       |                         |
| Hedonic outcome                          | 26        | 0.11        | -0.70, 0.92       | .790        |          |                       |                       |                         |
| Public outcome                           | 26        | 0.13        | -0.28, 0.54       | .538        |          |                       |                       |                         |
| Self-reported outcome                    | 26        | 0.05        | -1.31, 1.40       | .948        |          |                       |                       |                         |

Table S7. Stress behavior meta-regression

|                                          | <i>k</i>  | <i>d</i>     | 95% <i>CI</i>       | <i>p</i>    | <i>Q</i> | <i>p</i> ( <i>Q</i> ) | <i>I</i> <sup>2</sup> | <i>Tau</i> <sup>2</sup> |
|------------------------------------------|-----------|--------------|---------------------|-------------|----------|-----------------------|-----------------------|-------------------------|
| Overall effect size                      | 43        | 0.48         | 0.15, 0.80          | .004        | 269.07   | <.001                 | 84.39                 | 0.93                    |
| Moderators (univariate)                  | <i>k</i>  | <i>B</i>     | 95% <i>CI</i>       | <i>p</i>    |          |                       |                       |                         |
| Induction check effect size              | <b>23</b> | <b>-1.44</b> | <b>-2.38, -0.50</b> | <b>.003</b> |          |                       |                       |                         |
| Induction check effect size <sup>2</sup> | <b>23</b> | <b>1.65</b>  | <b>0.20, 3.10</b>   | <b>.026</b> |          |                       |                       |                         |
| Induction check present                  | 43        | -0.41        | -1.17, 0.36         | .296        |          |                       |                       |                         |
| Ambiguous induction                      | 43        | 0.32         | -0.75, 1.40         | .554        |          |                       |                       |                         |
| Published study                          | -         | -            | -                   | -           |          |                       |                       |                         |
| Participant characteristics              |           |              |                     |             |          |                       |                       |                         |
| Mean age                                 | 42        | -0.03        | -0.09, 0.04         | .463        |          |                       |                       |                         |
| Percent women                            | 43        | -0.00        | -0.01, 0.01         | .950        |          |                       |                       |                         |
| Percent white                            | 9         | -0.00        | -0.03, 0.03         | .720        |          |                       |                       |                         |
| Percent some college                     | 38        | -0.01        | -0.08, 0.05         | .676        |          |                       |                       |                         |
| Participant at risk                      | <b>43</b> | <b>1.14</b>  | <b>0.45, 1.83</b>   | <b>.001</b> |          |                       |                       |                         |
| Procedural details                       |           |              |                     |             |          |                       |                       |                         |
| Craving state                            | 43        | 0.60         | -0.06, 1.25         | .076        |          |                       |                       |                         |
| Randomization specified                  | 43        | 0.25         | -0.62, 1.13         | .570        |          |                       |                       |                         |
| Participant blinding                     | 43        | 0.75         | -0.14, 1.63         | .098        |          |                       |                       |                         |
| Internet research                        | -         | -            | -                   | -           |          |                       |                       |                         |
| Craving cue present                      | 43        | 0.05         | -0.85, 0.96         | .912        |          |                       |                       |                         |
| Health message                           |           |              |                     |             |          |                       |                       |                         |
| Induction type                           |           |              |                     |             |          |                       |                       |                         |
| Autobiographical                         | 43        | -0.26        | -1.73, 1.21         | .726        |          |                       |                       |                         |
| Imagination                              | 43        | 1.75         | -0.21, 3.71         | .081        |          |                       |                       |                         |
| Fabricated situation                     | 43        | 0.09         | -0.68, 0.86         | .818        |          |                       |                       |                         |
| Music                                    | -         | -            | -                   | -           |          |                       |                       |                         |
| Pictures                                 | -         | -            | -                   | -           |          |                       |                       |                         |
| Priming                                  | -         | -            | -                   | -           |          |                       |                       |                         |
| Reading                                  | -         | -            | -                   | -           |          |                       |                       |                         |
| Trier (speech)                           | 43        | -0.48        | -1.15, 0.20         | .164        |          |                       |                       |                         |
| Trier (cognitive)                        | 43        | -0.59        | -1.29, 0.10         | .094        |          |                       |                       |                         |
| Velten                                   | -         | -            | -                   | -           |          |                       |                       |                         |
| Video                                    | <b>43</b> | <b>1.37</b>  | <b>0.48, 2.23</b>   | <b>.002</b> |          |                       |                       |                         |
| Multiple induction types                 | 43        | -0.13        | -0.98, 0.73         | .770        |          |                       |                       |                         |
| Appetitive behavior                      |           |              |                     |             |          |                       |                       |                         |
| Eating                                   | 43        | -0.04        | -0.71, 0.64         | .919        |          |                       |                       |                         |
| Alcohol                                  | 43        | -0.26        | -1.03, 0.58         | .541        |          |                       |                       |                         |
| Smoking                                  | 43        | 0.30         | -0.51, 1.10         | .467        |          |                       |                       |                         |
| Sex                                      | -         | -            | -                   | -           |          |                       |                       |                         |
| Outcome characteristics                  |           |              |                     |             |          |                       |                       |                         |
| Hedonic outcome                          | <b>43</b> | <b>-1.03</b> | <b>-1.86, -0.20</b> | <b>.015</b> |          |                       |                       |                         |
| Public outcome                           | 43        | -0.15        | -0.54, 0.24         | .454        |          |                       |                       |                         |
| Self-reported outcome                    | 43        | -0.95        | -2.12, 0.22         | .113        |          |                       |                       |                         |

Table S8. Stress craving meta-regression

|                                          | <i>k</i>  | <i>d</i>    | 95% <i>CI</i>     | <i>p</i>    | <i>Q</i> | <i>p</i> ( <i>Q</i> ) | <i>I</i> <sup>2</sup> | <i>Tau</i> <sup>2</sup> |
|------------------------------------------|-----------|-------------|-------------------|-------------|----------|-----------------------|-----------------------|-------------------------|
| Overall effect size                      | 21        | 0.24        | -0.10, 0.58       | .172        | 74.70    | <.001                 | 73.23                 | 0.43                    |
| Moderators (univariate)                  | <i>k</i>  | <i>B</i>    | 95% <i>CI</i>     | <i>p</i>    |          |                       |                       |                         |
| Induction check effect size              | 7         | -           | -                 | -           |          |                       |                       |                         |
| Induction check effect size <sup>2</sup> | 7         | -           | -                 | -           |          |                       |                       |                         |
| Induction check present                  | 21        | 0.51        | -0.17, 1.19       | .140        |          |                       |                       |                         |
| Ambiguous induction                      | 21        | 0.20        | -1.32, 1.72       | .798        |          |                       |                       |                         |
| Published study                          | 21        | -0.60       | -2.05, 0.85       | .414        |          |                       |                       |                         |
| Participant characteristics              |           |             |                   |             |          |                       |                       |                         |
| Mean age                                 | <b>20</b> | <b>0.16</b> | <b>0.05, 0.27</b> | <b>.005</b> |          |                       |                       |                         |
| Percent women                            | 21        | -0.01       | -0.02, 0.00       | .123        |          |                       |                       |                         |
| Percent white                            | -         | -           | -                 | -           |          |                       |                       |                         |
| Percent some college                     | -         | -           | -                 | -           |          |                       |                       |                         |
| Participant at risk                      | 21        | 0.36        | -0.37, 1.09       | .337        |          |                       |                       |                         |
| Procedural details                       |           |             |                   |             |          |                       |                       |                         |
| Craving state                            | 21        | 0.05        | -0.88, 0.99       | .913        |          |                       |                       |                         |
| Randomization specified                  | -         | -           | -                 | -           |          |                       |                       |                         |
| Participant blinding                     | 21        | -0.43       | -1.48, 0.63       | .429        |          |                       |                       |                         |
| Internet research                        | -         | -           | -                 | -           |          |                       |                       |                         |
| Craving cue present                      | 21        | -0.25       | -1.35, 0.85       | .656        |          |                       |                       |                         |
| Health message                           | -         | -           | -                 | -           |          |                       |                       |                         |
| Induction type                           |           |             |                   |             |          |                       |                       |                         |
| Autobiographical                         | -         | -           | -                 | -           |          |                       |                       |                         |
| Imagination                              | -         | -           | -                 | -           |          |                       |                       |                         |
| Fabricated situation                     | -         | -           | -                 | -           |          |                       |                       |                         |
| Music                                    | -         | -           | -                 | -           |          |                       |                       |                         |
| Pictures                                 | -         | -           | -                 | -           |          |                       |                       |                         |
| Priming                                  | -         | -           | -                 | -           |          |                       |                       |                         |
| Reading                                  | -         | -           | -                 | -           |          |                       |                       |                         |
| Trier (speech)                           | 21        | -0.43       | -1.48, 0.63       | .429        |          |                       |                       |                         |
| Trier (cognitive)                        | 21        | -0.32       | -1.84, 1.20       | .681        |          |                       |                       |                         |
| Velten                                   | 21        | 0.60        | -0.84, 2.05       | .414        |          |                       |                       |                         |
| Video                                    | 21        | 0.20        | -1.32, 1.72       | .789        |          |                       |                       |                         |
| Multiple induction types                 | 21        | -0.32       | -1.84, 1.20       | .681        |          |                       |                       |                         |
| Appetitive behavior                      |           |             |                   |             |          |                       |                       |                         |
| Eating                                   | -         | -           | -                 | -           |          |                       |                       |                         |
| Alcohol                                  | -         | -           | -                 | -           |          |                       |                       |                         |
| Smoking                                  | -         | -           | -                 | -           |          |                       |                       |                         |
| Sex                                      | -         | -           | -                 | -           |          |                       |                       |                         |
| Outcome characteristics                  |           |             |                   |             |          |                       |                       |                         |
| Hedonic outcome                          | -         | -           | -                 | -           |          |                       |                       |                         |

Table S9. Sadness behavior meta-regression

|                                          | <i>k</i> | <i>d</i> | 95% <i>CI</i> | <i>p</i> | <i>Q</i> | <i>p</i> ( <i>Q</i> ) | <i>I</i> <sup>2</sup> | <i>Tau</i> <sup>2</sup> |
|------------------------------------------|----------|----------|---------------|----------|----------|-----------------------|-----------------------|-------------------------|
| <i>Overall effect size</i>               | 33       | 0.10     | -0.06, 0.25   | .211     | 60.65    | .002                  | 47.25                 | 0.09                    |
| <i>Moderators (univariate)</i>           | <i>k</i> | <i>B</i> | 95% <i>CI</i> | <i>p</i> |          |                       |                       |                         |
| Induction check effect size              | 23       | 0.15     | -0.13, 0.43   | .297     |          |                       |                       |                         |
| Induction check effect size <sup>2</sup> | 23       | -0.12    | -0.51, 0.27   | .547     |          |                       |                       |                         |
| Induction check present                  | 33       | -0.09    | -0.46, 0.29   | .649     |          |                       |                       |                         |
| Ambiguous induction                      | 33       | -0.18    | -1.14, 0.79   | .717     |          |                       |                       |                         |
| Published study                          | 33       | 0.23     | -0.17, 0.63   | .254     |          |                       |                       |                         |
| <i>Participant characteristics</i>       |          |          |               |          |          |                       |                       |                         |
| Mean age                                 | 33       | 0.02     | -0.00, 0.04   | .142     |          |                       |                       |                         |
| Percent women                            | 30       | -0.00    | -0.01, 0.01   | .545     |          |                       |                       |                         |
| Percent white                            | 6        | -0.00    | -0.02, 0.02   | .707     |          |                       |                       |                         |
| Percent some college                     | 30       | -0.00    | -0.02, 0.01   | .440     |          |                       |                       |                         |
| Participant at risk                      | 33       | 0.23     | -0.15, 0.61   | .229     |          |                       |                       |                         |
| <i>Procedural details</i>                |          |          |               |          |          |                       |                       |                         |
| Craving state                            | 33       | 0.22     | -0.09, 0.53   | .165     |          |                       |                       |                         |
| Randomization specified                  | 33       | -0.10    | -0.42, 0.23   | .552     |          |                       |                       |                         |
| Participant blinding                     | 33       | -0.06    | -0.39, 0.27   | .717     |          |                       |                       |                         |
| Internet research                        | -        | -        | -             | -        |          |                       |                       |                         |
| Craving cue present                      | 33       | -0.08    | -0.48, 0.33   | .706     |          |                       |                       |                         |
| Health message                           | 33       | -0.05    | -1.06, 0.97   | .930     |          |                       |                       |                         |
| <i>Induction type</i>                    |          |          |               |          |          |                       |                       |                         |
| Autobiographical                         | 33       | 0.06     | -0.26, 0.38   | .711     |          |                       |                       |                         |
| Imagination                              | 33       | -0.01    | -0.41, 0.38   | .953     |          |                       |                       |                         |
| Fabricated situation                     | -        | -        | -             | -        |          |                       |                       |                         |
| Music                                    | 33       | -0.12    | -0.62, 0.39   | .646     |          |                       |                       |                         |
| Pictures                                 | -        | -        | -             | -        |          |                       |                       |                         |
| Priming                                  | -        | -        | -             | -        |          |                       |                       |                         |
| Reading                                  | 33       | -0.01    | -0.41, 0.38   | .953     |          |                       |                       |                         |
| Trier (speech)                           | -        | -        | -             | -        |          |                       |                       |                         |
| Trier (cognitive)                        | -        | -        | -             | -        |          |                       |                       |                         |
| Velten                                   | 33       | -0.50    | -1.00, 0.01   | .056     |          |                       |                       |                         |
| Video                                    | 33       | 0.12     | -0.21, 0.44   | .485     |          |                       |                       |                         |
| Multiple induction types                 | 33       | -0.08    | -0.41, 0.25   | .652     |          |                       |                       |                         |
| <i>Appetitive behavior</i>               |          |          |               |          |          |                       |                       |                         |
| Eating                                   | 33       | -0.09    | -0.47, 0.30   | .652     |          |                       |                       |                         |
| Alcohol                                  | 33       | -0.16    | -0.71, 0.39   | .566     |          |                       |                       |                         |
| Smoking                                  | 33       | 0.24     | -0.22, 0.71   | .304     |          |                       |                       |                         |
| Sex                                      | -        | -        | -             | -        |          |                       |                       |                         |
| <i>Outcome characteristics</i>           |          |          |               |          |          |                       |                       |                         |
| Hedonic outcome                          | 33       | 0.99     | -0.06, 2.04   | .064     |          |                       |                       |                         |
| Public outcome                           | 33       | 0.09     | -0.14, 0.31   | .450     |          |                       |                       |                         |
| Self-reported outcome                    | -        | -        | -             | -        |          |                       |                       |                         |

Table S10. Positive affective states (all) behavior meta-regression

|                                          | <i>k</i>  | <i>d</i>     | 95% CI              | <i>p</i>    | <i>Q</i> | <i>p</i> ( <i>Q</i> ) | <i>I</i> <sup>2</sup> | <i>Tau</i> <sup>2</sup> |
|------------------------------------------|-----------|--------------|---------------------|-------------|----------|-----------------------|-----------------------|-------------------------|
| Overall effect size                      | 41        | 0.08         | -0.22, 0.39         | .592        | 264.78   | <.001                 | 84.89                 | 0.78                    |
| Moderators (univariate)                  | <i>k</i>  | <i>B</i>     | 95% CI              | <i>p</i>    |          |                       |                       |                         |
| Induction check effect size              | 22        | 0.06         | -0.04, 0.15         | .224        |          |                       |                       |                         |
| Induction check effect size <sup>2</sup> | 22        | -0.03        | -0.06, 0.01         | .123        |          |                       |                       |                         |
| Induction check present                  | 41        | 0.12         | -0.58, 0.83         | .731        |          |                       |                       |                         |
| Ambiguous induction                      | 41        | 0.08         | -0.65, 0.80         | .833        |          |                       |                       |                         |
| Published study                          | 41        | 0.01         | -1.34, 1.35         | .992        |          |                       |                       |                         |
| Participant characteristics              |           |              |                     |             |          |                       |                       |                         |
| Mean age                                 | 37        | -0.02        | -0.07, 0.02         | .301        |          |                       |                       |                         |
| Percent women                            | 33        | 0.01         | -0.01, 0.02         | .060        |          |                       |                       |                         |
| Percent white                            | 8         | -            | -                   | -           |          |                       |                       |                         |
| Percent some college                     | 30        | -0.00        | -0.02, 0.02         | .866        |          |                       |                       |                         |
| Participant at risk                      | <b>41</b> | <b>-0.78</b> | <b>-1.54, -0.02</b> | <b>.044</b> |          |                       |                       |                         |
| Procedural details                       |           |              |                     |             |          |                       |                       |                         |
| Craving state                            | 41        | 0.29         | -0.37, 0.94         | .394        |          |                       |                       |                         |
| Randomization specified                  | 41        | -0.39        | -1.77, 0.98         | .576        |          |                       |                       |                         |
| Participant blinding                     | 41        | 0.43         | -0.26, 1.11         | .221        |          |                       |                       |                         |
| Internet research                        | 41        | -0.07        | -1.95, 1.81         | .942        |          |                       |                       |                         |
| Craving cue present                      | 41        | 0.09         | -1.05, 1.23         | .876        |          |                       |                       |                         |
| Health message                           | 41        | 0.25         | -1.70, 2.20         | .780        |          |                       |                       |                         |
| Induction type                           |           |              |                     |             |          |                       |                       |                         |
| Autobiographical                         | 41        | 0.19         | -0.94, 1.32         | .745        |          |                       |                       |                         |
| Imagination                              | -         | -            | -                   | -           |          |                       |                       |                         |
| Fabricated situation                     | 41        | 0.05         | -1.74, 1.83         | .958        |          |                       |                       |                         |
| Music                                    | 41        | 0.18         | -0.67, 1.02         | .681        |          |                       |                       |                         |
| Pictures                                 | 41        | 0.09         | -0.93, 1.11         | .867        |          |                       |                       |                         |
| Priming                                  | 41        | -0.03        | -1.21, 1.15         | .964        |          |                       |                       |                         |
| Reading                                  | -         | -            | -                   | -           |          |                       |                       |                         |
| Smell                                    | -         | -            | -                   | -           |          |                       |                       |                         |
| Trier (speech)                           | -         | -            | -                   | -           |          |                       |                       |                         |
| Trier (cognitive)                        | 41        | -0.03        | -1.51, 1.45         | .970        |          |                       |                       |                         |
| Velten                                   | 41        | 0.02         | -0.93, 0.97         | .967        |          |                       |                       |                         |
| Video                                    | 41        | -0.10        | -0.72, 0.52         | .755        |          |                       |                       |                         |
| Multiple induction types                 | 41        | 0.06         | -0.43, 0.55         | .820        |          |                       |                       |                         |
| Appetitive behavior                      |           |              |                     |             |          |                       |                       |                         |
| Eating                                   | 41        | 0.34         | -0.36, 1.03         | .340        |          |                       |                       |                         |
| Alcohol                                  | 41        | -0.10        | -1.11, 0.92         | .848        |          |                       |                       |                         |
| Smoking                                  | 41        | -0.41        | -1.23, 0.41         | .330        |          |                       |                       |                         |
| Sex                                      | -         | -            | -                   | -           |          |                       |                       |                         |
| Outcome characteristics                  |           |              |                     |             |          |                       |                       |                         |
| Hedonic outcome                          | 41        | -0.40        | -1.20, 0.41         | .332        |          |                       |                       |                         |
| Public outcome                           | 41        | 0.16         | -0.39, 0.72         | .564        |          |                       |                       |                         |
| Self-reported outcome                    | 41        | 1.15         | -1.16, 3.45         | .331        |          |                       |                       |                         |
| Affective state                          |           |              |                     |             |          |                       |                       |                         |
| Positive mood                            | 41        | 0.12         | -0.55, 0.79         | .722        |          |                       |                       |                         |
| Amusement                                | 41        | -0.15        | -0.80, 0.50         | .643        |          |                       |                       |                         |
| Contentment                              | 41        | 0.15         | -1.88, 2.18         | .884        |          |                       |                       |                         |
| Happiness                                | 41        | -0.13        | -1.05, 0.79         | .786        |          |                       |                       |                         |
| Pride                                    | 41        | -0.00        | -0.86, 0.85         | .993        |          |                       |                       |                         |



Table S11. Positive affective states (all) intentions meta-regression

|                                          | <i>k</i>  | <i>d</i>     | 95% <i>CI</i>       | <i>p</i>        | <i>Q</i> | <i>p</i> ( <i>Q</i> ) | <i>I</i> <sup>2</sup> | <i>Tau</i> <sup>2</sup> |
|------------------------------------------|-----------|--------------|---------------------|-----------------|----------|-----------------------|-----------------------|-------------------------|
| <i>Overall effect size</i>               | 22        | 0.08         | -0.10, 0.25         | .392            | 39.38    | .009                  | 46.68                 | 0.08                    |
| <i>Moderators (univariate)</i>           | <i>k</i>  | <i>B</i>     | 95% <i>CI</i>       | <i>p</i>        |          |                       |                       |                         |
| Induction check effect size              | 16        | -0.08        | -0.31, 0.15         | .485            |          |                       |                       |                         |
| Induction check effect size <sup>2</sup> | 16        | -0.09        | -0.38, 0.20         | .544            |          |                       |                       |                         |
| Induction check present                  | 22        | -0.14        | -0.92, 0.63         | .714            |          |                       |                       |                         |
| Ambiguous induction                      | -         | -            | -                   | -               |          |                       |                       |                         |
| Published study                          | 22        | 0.17         | -0.20, 0.53         | .377            |          |                       |                       |                         |
| Participant characteristics              |           |              |                     |                 |          |                       |                       |                         |
| Mean age                                 | 22        | -0.01        | -0.02, 0.01         | .448            |          |                       |                       |                         |
| Percent women                            | <b>16</b> | <b>-0.01</b> | <b>-0.01, -0.00</b> | <b>.037</b>     |          |                       |                       |                         |
| Percent white                            | -         | -            | -                   | -               |          |                       |                       |                         |
| Percent some college                     | -         | -            | -                   | -               |          |                       |                       |                         |
| Participant at risk                      | 22        | 0.62         | -0.48, 1.71         | .268            |          |                       |                       |                         |
| Procedural details                       |           |              |                     |                 |          |                       |                       |                         |
| Craving state                            | 22        | 0.18         | -0.76, 1.12         | .705            |          |                       |                       |                         |
| Randomization specified                  | -         | -            | -                   | -               |          |                       |                       |                         |
| Participant blinding                     | -         | -            | -                   | -               |          |                       |                       |                         |
| Internet research                        | 22        | -0.13        | -0.49, 0.23         | .471            |          |                       |                       |                         |
| Craving cue present                      | <b>22</b> | <b>0.88</b>  | <b>0.43, 1.34</b>   | <b>&lt;.001</b> |          |                       |                       |                         |
| Health message                           | 22        | -0.04        | -0.42, 0.34         | .850            |          |                       |                       |                         |
| Induction type                           |           |              |                     |                 |          |                       |                       |                         |
| Autobiographical                         | 22        | 0.01         | -0.50, 0.51         | .985            |          |                       |                       |                         |
| Imagination                              | 22        | -0.09        | -0.71, 0.52         | .756            |          |                       |                       |                         |
| Fabricated situation                     | -         | -            | -                   | -               |          |                       |                       |                         |
| Music                                    | 22        | -0.04        | -0.53, 0.45         | .865            |          |                       |                       |                         |
| Pictures                                 | -         | -            | -                   | -               |          |                       |                       |                         |
| Priming                                  | -         | -            | -                   | -               |          |                       |                       |                         |
| Reading                                  | -         | -            | -                   | -               |          |                       |                       |                         |
| Trier (speech)                           | -         | -            | -                   | -               |          |                       |                       |                         |
| Trier (cognitive)                        | 22        | 0.14         | -0.63, 0.92         | .714            |          |                       |                       |                         |
| Velten                                   | -         | -            | -                   | -               |          |                       |                       |                         |
| Video                                    | <b>22</b> | <b>0.97</b>  | <b>0.38, 1.56</b>   | <b>.001</b>     |          |                       |                       |                         |
| Multiple induction types                 | 22        | 0.34         | -0.06, 0.75         | .099            |          |                       |                       |                         |
| Appetitive behavior                      |           |              |                     |                 |          |                       |                       |                         |
| Eating                                   | 22        | 0.14         | -0.24, 0.53         | .463            |          |                       |                       |                         |
| Alcohol                                  | 22        | -0.17        | -0.53, 0.19         | .357            |          |                       |                       |                         |
| Smoking                                  | -         | -            | -                   | -               |          |                       |                       |                         |
| Sex                                      | 22        | 0.04         | -0.69, 0.77         | .906            |          |                       |                       |                         |
| Outcome characteristics                  |           |              |                     |                 |          |                       |                       |                         |
| Hedonic outcome                          | -         | -            | -                   | -               |          |                       |                       |                         |
| Affective state                          |           |              |                     |                 |          |                       |                       |                         |
| Amusement                                | <b>22</b> | <b>0.97</b>  | <b>0.38, 1.56</b>   | <b>.001</b>     |          |                       |                       |                         |
| Contentment                              | 22        | -0.10        | -0.71, 0.52         | .756            |          |                       |                       |                         |
| Happiness                                | 22        | -0.12        | -0.48, 0.24         | .512            |          |                       |                       |                         |
| Hope                                     | 22        | -0.05        | -0.60, 0.51         | .873            |          |                       |                       |                         |
| Pride                                    | 22        | -0.04        | -0.47, 0.40         | .869            |          |                       |                       |                         |
| Surprise                                 | 22        | -0.19        | -0.76, 0.38         | .508            |          |                       |                       |                         |

Table S12. Positive affective states (all) attitudes/ evaluations/ expectations meta-regression

|                                          | <i>k</i>  | <i>d</i>     | 95% CI              | <i>p</i>        | <i>Q</i> | <i>p</i> ( <i>Q</i> ) | <i>I</i> <sup>2</sup> | <i>Tau</i> <sup>2</sup> |
|------------------------------------------|-----------|--------------|---------------------|-----------------|----------|-----------------------|-----------------------|-------------------------|
| Overall effect size                      | 19        | -0.10        | -0.27, 0.07         | .238            | 30.43    | .033                  | 40.86                 | 0.06                    |
| Moderators (univariate)                  | <i>k</i>  | <i>B</i>     | 95% CI              | <i>p</i>        |          |                       |                       |                         |
| Induction check effect size              | 10        | -            | -                   | -               |          |                       |                       |                         |
| Induction check effect size <sup>2</sup> | 10        | -            | -                   | -               |          |                       |                       |                         |
| Induction check present                  | 19        | 0.53         | -0.20, 1.27         | .155            |          |                       |                       |                         |
| Ambiguous induction                      | <b>19</b> | <b>0.51</b>  | <b>0.21, 0.81</b>   | <b>&lt;.001</b> |          |                       |                       |                         |
| Published study                          | 19        | -0.00        | -0.41, 0.40         | .983            |          |                       |                       |                         |
| Participant characteristics              |           |              |                     |                 |          |                       |                       |                         |
| Mean age                                 | <b>14</b> | <b>0.05</b>  | <b>0.01, 0.08</b>   | <b>.005</b>     |          |                       |                       |                         |
| Percent women                            | <b>10</b> | <b>-0.01</b> | <b>-0.02, -0.00</b> | <b>.015</b>     |          |                       |                       |                         |
| Percent white                            | 7         | -            | -                   | -               |          |                       |                       |                         |
| Percent some college                     | 14        | -            | -                   | -               |          |                       |                       |                         |
| Participant at risk                      | 19        | -0.65        | -1.71, 0.40         | .225            |          |                       |                       |                         |
| Procedural details                       |           |              |                     |                 |          |                       |                       |                         |
| Craving state                            | 19        | 0.19         | -0.21, 0.59         | .350            |          |                       |                       |                         |
| Randomization specified                  | 19        | 0.04         | -0.85, 0.93         | .931            |          |                       |                       |                         |
| Participant blinding                     | 19        | 0.02         | -0.41, 0.45         | .942            |          |                       |                       |                         |
| Internet research                        | 19        | -0.04        | -0.50, 0.41         | .850            |          |                       |                       |                         |
| Craving cue present                      | 19        | 0.45         | -0.22, 1.12         | .187            |          |                       |                       |                         |
| Health message                           | 19        | -0.06        | -0.50, 0.39         | .798            |          |                       |                       |                         |
| Induction type                           |           |              |                     |                 |          |                       |                       |                         |
| Autobiographical                         | 19        | 0.04         | -0.61, 0.68         | .914            |          |                       |                       |                         |
| Imagination                              | 19        | 0.04         | -0.54, 0.61         | .901            |          |                       |                       |                         |
| Fabricated situation                     | -         | -            | -                   | -               |          |                       |                       |                         |
| Music                                    | 19        | 0.18         | -0.24, 0.59         | .404            |          |                       |                       |                         |
| Pictures                                 | -         | -            | -                   | -               |          |                       |                       |                         |
| Priming                                  | -         | -            | -                   | -               |          |                       |                       |                         |
| Reading                                  | 19        | -0.05        | -0.41, 0.31         | .776            |          |                       |                       |                         |
| Trier (speech)                           | -         | -            | -                   | -               |          |                       |                       |                         |
| Trier (cognitive)                        | -         | -            | -                   | -               |          |                       |                       |                         |
| Velten                                   | 19        | -0.02        | -0.51, 0.47         | .935            |          |                       |                       |                         |
| Video                                    | 19        | -0.00        | -0.72, 0.72         | .996            |          |                       |                       |                         |
| Multiple induction types                 | 19        | -0.03        | -0.39, 0.33         | .867            |          |                       |                       |                         |
| Appetitive behavior                      |           |              |                     |                 |          |                       |                       |                         |
| Eating                                   | 19        | -0.14        | -0.47, 0.20         | .434            |          |                       |                       |                         |
| Alcohol                                  | 19        | 0.00         | -0.38, 0.38         | .986            |          |                       |                       |                         |
| Smoking                                  | 19        | 0.22         | -0.65, 1.09         | .613            |          |                       |                       |                         |
| Sex                                      | <b>19</b> | <b>0.73</b>  | <b>0.28, 1.17</b>   | <b>.001</b>     |          |                       |                       |                         |
| Outcome characteristics                  |           |              |                     |                 |          |                       |                       |                         |
| Hedonic outcome                          | 19        | -0.12        | -0.67, 0.43         | .669            |          |                       |                       |                         |
| Affective state                          |           |              |                     |                 |          |                       |                       |                         |
| Positive mood                            | 19        | 0.18         | -0.26, 0.62         | .431            |          |                       |                       |                         |
| Contentment                              | 19        | -0.13        | -0.59, 0.34         | .595            |          |                       |                       |                         |
| Happiness                                | 19        | 0.08         | -0.27, 0.44         | .651            |          |                       |                       |                         |
| Hope                                     | 19        | 0.03         | -0.50, 0.56         | .912            |          |                       |                       |                         |
| Pride                                    | 19        | -0.05        | -0.45, 0.35         | .822            |          |                       |                       |                         |

Table S13. Amusement behavior meta-regression

|                                          | <i>k</i>  | <i>d</i>     | 95% <i>CI</i>       | <i>p</i>    | <i>Q</i> | <i>p</i> ( <i>Q</i> ) | <i>I</i> <sup>2</sup> | <i>Tau</i> <sup>2</sup> |
|------------------------------------------|-----------|--------------|---------------------|-------------|----------|-----------------------|-----------------------|-------------------------|
| <i>Overall effect size</i>               | 15        | -0.05        | -0.47, 0.37         | .818        | 58.70    | <.001                 | 76.15                 | 0.45                    |
| <i>Moderators (univariate)</i>           | <i>k</i>  | <i>B</i>     | 95% <i>CI</i>       | <i>p</i>    |          |                       |                       |                         |
| Induction check effect size              | 9         | -            | -                   | -           |          |                       |                       |                         |
| Induction check effect size <sup>2</sup> | 9         | -            | -                   | -           |          |                       |                       |                         |
| Induction check present                  | 15        | 0.47         | -0.55, 1.49         | .366        |          |                       |                       |                         |
| Ambiguous induction                      | -         | -            | -                   | -           |          |                       |                       |                         |
| Published study                          | 15        | -0.15        | -1.32, 1.02         | .804        |          |                       |                       |                         |
| Participant characteristics              |           |              |                     |             |          |                       |                       |                         |
| Mean age                                 | 11        | -            | -                   | -           |          |                       |                       |                         |
| Percent women                            | <b>12</b> | <b>0.03</b>  | <b>0.01, 0.05</b>   | <b>.004</b> |          |                       |                       |                         |
| Percent white                            | -         | -            | -                   | -           |          |                       |                       |                         |
| Percent some college                     | -         | -            | -                   | -           |          |                       |                       |                         |
| Participant at risk                      | 15        | 0.23         | -0.90, 1.36         | .689        |          |                       |                       |                         |
| Procedural details                       |           |              |                     |             |          |                       |                       |                         |
| Craving state                            | 15        | 0.56         | -0.67, 1.78         | .371        |          |                       |                       |                         |
| Randomization specified                  |           |              |                     |             |          |                       |                       |                         |
| Participant blinding                     | <b>15</b> | <b>1.28</b>  | <b>0.21, 2.35</b>   | <b>.019</b> |          |                       |                       |                         |
| Internet research                        | 15        | 0.06         | -1.53, 1.66         | .938        |          |                       |                       |                         |
| Craving cue present                      | -         | -            | -                   | -           |          |                       |                       |                         |
| Health message                           | -         | -            | -                   | -           |          |                       |                       |                         |
| Induction type                           |           |              |                     |             |          |                       |                       |                         |
| Autobiographical                         | -         | -            | -                   | -           |          |                       |                       |                         |
| Imagination                              | -         | -            | -                   | -           |          |                       |                       |                         |
| Fabricated situation                     | -         | -            | -                   | -           |          |                       |                       |                         |
| Music                                    | -         | -            | -                   | -           |          |                       |                       |                         |
| Pictures                                 | -         | -            | -                   | -           |          |                       |                       |                         |
| Priming                                  | -         | -            | -                   | -           |          |                       |                       |                         |
| Reading                                  | -         | -            | -                   | -           |          |                       |                       |                         |
| Trier (speech)                           | -         | -            | -                   | -           |          |                       |                       |                         |
| Trier (cognitive)                        | -         | -            | -                   | -           |          |                       |                       |                         |
| Velten                                   | -         | -            | -                   | -           |          |                       |                       |                         |
| Video                                    | -         | -            | -                   | -           |          |                       |                       |                         |
| Multiple induction types                 | -         | -            | -                   | -           |          |                       |                       |                         |
| Appetitive behavior                      |           |              |                     |             |          |                       |                       |                         |
| Eating                                   | <b>15</b> | <b>1.85</b>  | <b>0.58, 3.11</b>   | <b>.004</b> |          |                       |                       |                         |
| Alcohol                                  | -         | -            | -                   | -           |          |                       |                       |                         |
| Smoking                                  | <b>15</b> | <b>-1.85</b> | <b>-3.11, -0.58</b> | <b>.004</b> |          |                       |                       |                         |
| Sex                                      |           |              |                     |             |          |                       |                       |                         |
| Outcome characteristics                  |           |              |                     |             |          |                       |                       |                         |
| Hedonic outcome                          | 15        | -0.75        | -1.71, 0.21         | .126        |          |                       |                       |                         |
| Public outcome                           | 15        | 0.35         | -0.60, 1.30         | .465        |          |                       |                       |                         |
| Self-reported outcome                    | 15        | 1.32         | -0.71, 3.34         | .202        |          |                       |                       |                         |

Table S14. Publication bias

|                                        | k   | Egger's | 95% CI       | p    | Fail safe N | Duval & Tweedie studies trimmed |
|----------------------------------------|-----|---------|--------------|------|-------------|---------------------------------|
| <b>Negative affective states (all)</b> |     |         |              |      |             |                                 |
| Behavior                               | 120 | 0.82    | -0.34, 2.00  | .162 | 1520        | 27                              |
| Craving                                | 31  | 0.69    | -1.18, 2.56  | .456 | 124         | 8                               |
| <b>Negative mood</b>                   |     |         |              |      |             |                                 |
| Behavior                               | 26  | 1.44    | -0.80, 3.69  | .202 | 399         | 9                               |
| Perceived behavioral control           | 4   | -3.55   | -6.96, -0.13 | .046 | 30          | 1                               |
| <b>Stress</b>                          |     |         |              |      |             |                                 |
| Behavior                               | 43  | 0.72    | -1.82, 3.27  | .563 | 70          | 2                               |

Figure S1. Curvilinear associations of induction check effect size with behavioral outcomes. **Top panel:** Negative affect inductions: Behavior effect sizes as a function of Induction Effect Sizes<sup>2</sup>. **Bottom panel:** Stress inductions: Behavior effect sizes as a function of Induction Effect Sizes<sup>2</sup>

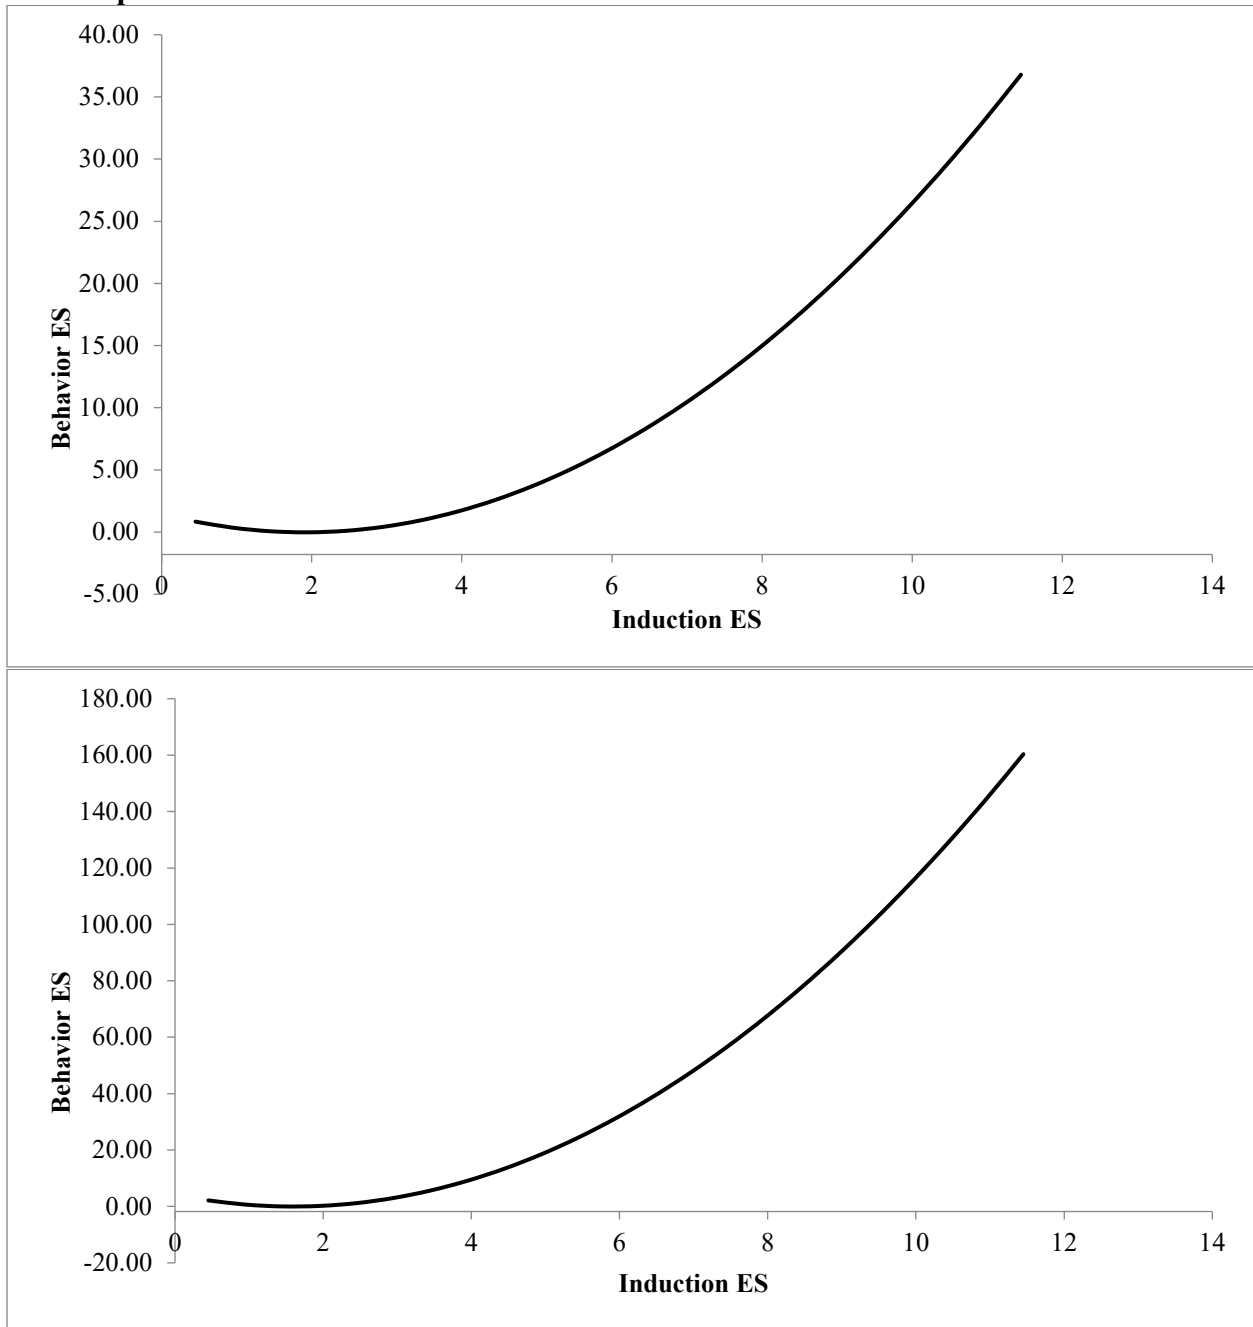

Figure S2. Funnel plots of effect sizes

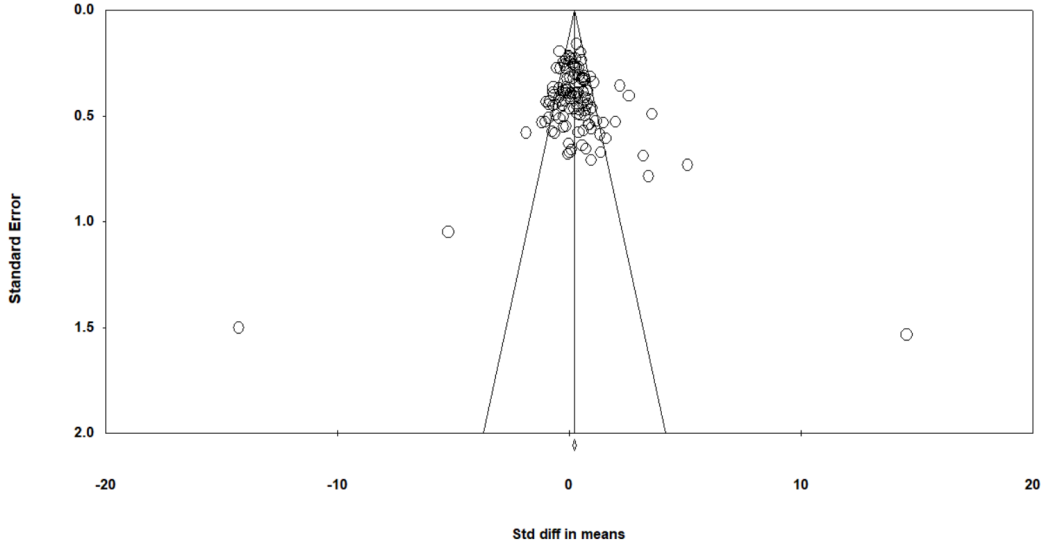

(Effect of negative affective states on behavior)

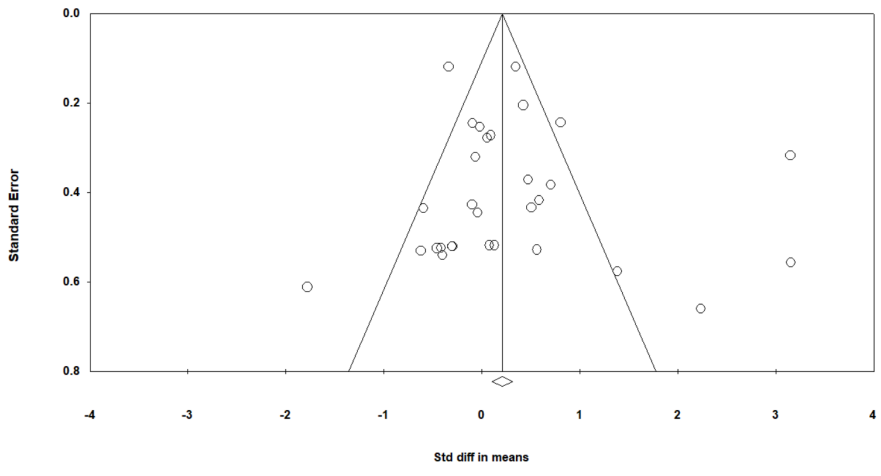

(Effect of negative affective states on craving)

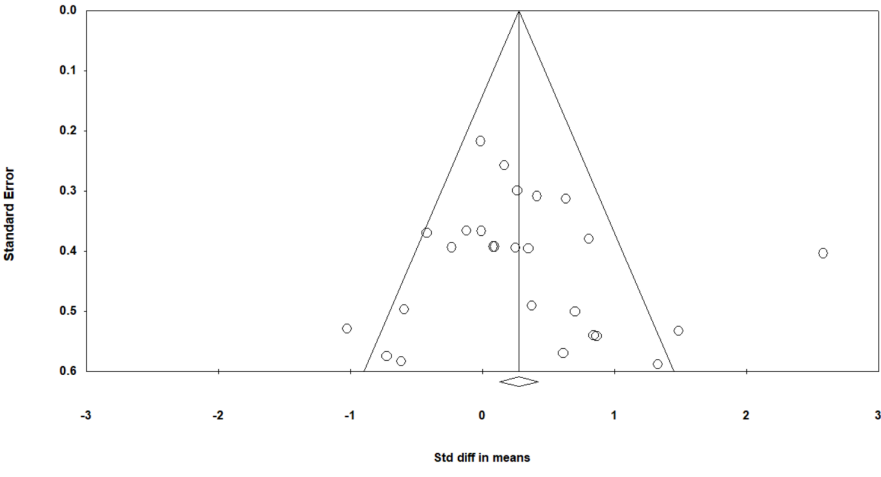

(Effect of negative mood on behavior)

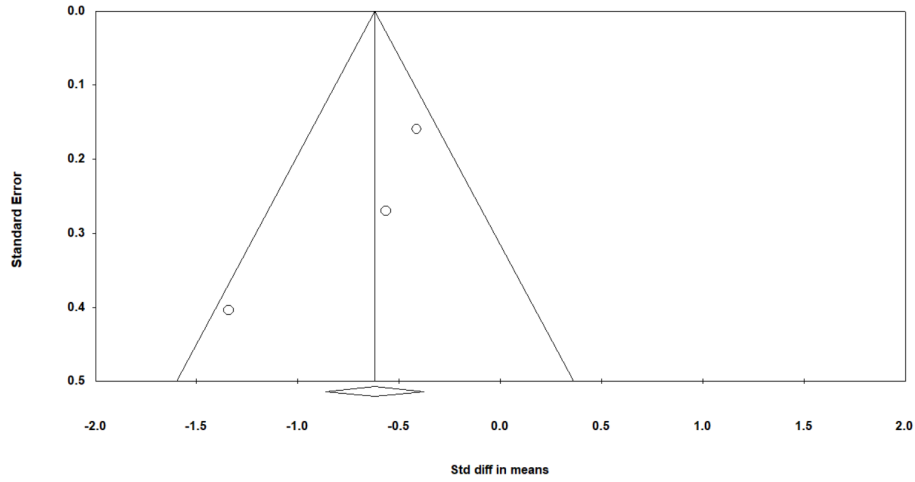

(Effect of negative mood on perceived behavioral control)

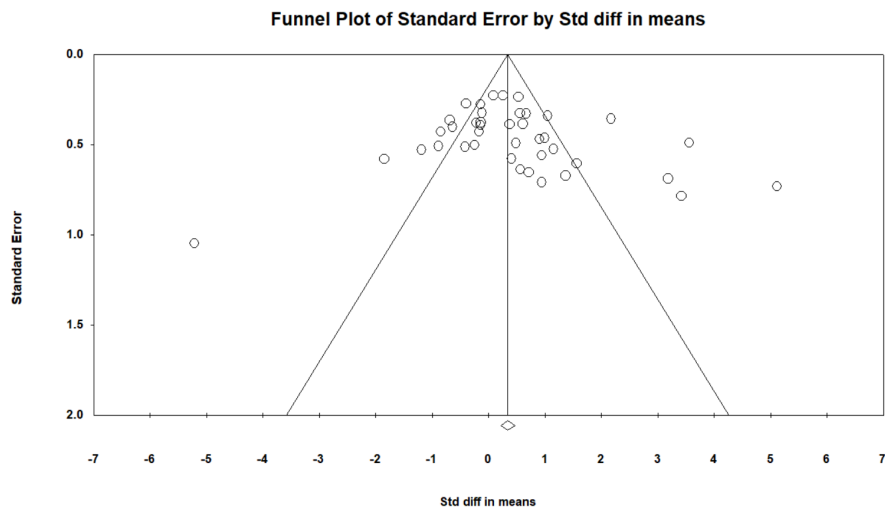

(Effect of stress on behavior)

## References

- Agras, W. S., & Telch, C. F. (1998). The effects of caloric deprivation and negative affect on binge eating in obese binge-eating disordered women. *Behavior Therapy, 29*(3), 491-503.
- Agrawal, N., & Duhachek, A. (2010). Emotional compatibility and the effectiveness of antidrinking messages: A defensive processing perspective on shame and guilt. *Journal of Marketing Research, 47*(2), 263-273.
- Allen Catellier, J. R. (2012). *Understanding the effects of emotion on information seeking and health behaviors: Improving communication to promote healthy lifestyles*. Unpublished Doctoral Dissertation. State University of New York Buffalo.
- Andrade, E. B. (2005). Behavioral consequences of affect: Combining evaluative and regulatory mechanisms. *Journal of Consumer Research, 32*(3), 355-362. doi:10.1086/497546
- Bacon, A. K., & Engerman, B. (2018). Excluded, then inebriated: A preliminary investigation into the role of ostracism on alcohol consumption. *Addictive Behavior Reports, 8*, 25-32.
- Bongers, P., de Graaff, A., & Jansen, A. (2016). 'Emotional' does not even start to cover it: Generalization of overeating in emotional eaters. *Appetite, 96*, 611-616.
- Bongers, P., Jansen, A., Havermans, R., Roefs, A., & Nederkoorn, C. (2013). Happy eating. The underestimated role of overeating in a positive mood. *Appetite, 67*, 74-80.
- Bongers, P., van den Akker, K., Havermans, R., & Jansen, A. (2015). Emotional eating and Pavlovian learning: Does negative mood facilitate appetitive conditioning? *Appetite, 89*, 226-236.
- Boyer, C. (1998). *Dysphoric mood, restraint, and eating behavior*. Unpublished Doctoral Dissertation. University of Delaware.
- Bridgell, D. W., Rimm, D. C., Caddy, G. R., & Dunn, N. J. (1979). Analogue assessment, affective arousal, and the smoking taste test. *Addict Behav, 4*(3), 287-295.
- Cardi, V., Esposito, M., Clarke, A., Schifano, S., & Treasure, J. (2015). The impact of induced positive mood on symptomatic behaviour in eating disorders. An experimental, AB/BA crossover design testing a multimodal presentation during a test-meal. *Appetite, 87*, 192-198.
- Carvalho, J., Pereira, R., Barreto, D., & Nobre, P. J. (2017). The effects of positive versus negative mood states on attentional processes during exposure to erotica. *Archives of Sexual Behavior, 46*(8), 2495-2504.
- Chan, C., Van Boven, L., Andrade, E. B., & Ariely, D. (2014). Moral violations reduce oral consumption. *Journal of Consumer Psychology, 24*(3), 381-386.
- Chua, J. L., Touyz, S., & Hill, A. J. (2004). Negative mood-induced overeating in obese binge eaters: an experimental study. *Int J Obes Relat Metab Disord, 28*(4), 606-610. doi:10.1038/sj.ijo.0802595
- Cools, J., Schotte, D. E., & McNally, R. J. (1992). Emotional arousal and overeating in restrained eaters. *J Abnorm Psychol, 101*(2), 348.
- Dobbs, S. D., Strickler, D. P., & Maxwell, W. A. (1981). The effects of stress and relaxation in the presence of stress on urinary pH and smoking behaviors. *Addict Behav, 6*(4), 345-353.
- Dorison, C. A., Wang, K., Rees, V. W., Kawachi, I., Ericson, K. M. M., & Lerner, J. S. (2019). *Emotion, impatience, and addictive behavior*. Under Review.



- Dutton, C. E. (2017). *An experimental test of the effects of social conflict on posttraumatic stress symptoms and alcohol craving*. Unpublished Doctoral Dissertation. University of Arkansas.
- Emery, N. N., & Simons, J. S. (2015). Mood & alcohol-related attentional biases: New considerations for gender differences and reliability of the visual-probe task. *Addict Behav*, *50*, 1-5.
- Emond, M., Ten Eycke, K., Kosmerly, S., Robinson, A. L., Stillar, A., & Van Blyderveen, S. (2016). The effect of academic stress and attachment stress on stress-eaters and stress-undereaters. *Appetite*, *100*, 210-215.
- Evers, C., Adriaanse, M., de Ridder, D. T., & de Witt Huberts, J. C. (2013). Good mood food. Positive emotion as a neglected trigger for food intake. *Appetite*, *68*, 1-7.
- Evers, C., de Ridder, D. T., & Adriaanse, M. A. (2009). Assessing yourself as an emotional eater: Mission impossible? *Health Psychology*, *28*(6), 717.
- Evers, C., Marijn Stok, F., & de Ridder, D. T. (2010). Feeding your feelings: Emotion regulation strategies and emotional eating. *Personality and Social Psychology Bulletin*, *36*(6), 792-804.
- Fedorikhin, A., & Patrick, V. M. (2010). Positive mood and resistance to temptation: The interfering influence of elevated arousal. *Journal of Consumer Research*, *37*(4), 698-711.
- Ferrer, R. A., Klein, W. M., & Graff, K. A. (2017). Self-affirmation increases defensiveness toward health risk information among those experiencing negative emotions: Results from two national samples. *Health Psychology*, *36*(4), 380.
- Field, M., & Powell, H. (2007). Stress increases attentional bias for alcohol cues in social drinkers who drink to cope. *Alcohol & Alcoholism*, *42*(6), 560-566.
- Field, M., & Quigley, M. (2009). Mild stress increases attentional bias in social drinkers who drink to cope: A replication and extension. *Experimental Clinical Psychopharmacology*, *17*(5), 312.
- Frost, R. O., Goolkasian, G. A., Ely, R. J., & Blanchard, F. A. (1982). Depression, restraint and eating behavior. *Behaviour Research Therapy*, *20*(2), 113-121.
- Fucito, L. M., & Juliano, L. M. (2009). Depression moderates smoking behavior in response to a sad mood induction. *Psychology of Addictive Behavior*, *23*(3), 546.
- Gardner, M., & Steinberg, L. (2005). Peer influence on risk taking, risk preference, and risky decision making in adolescence and adulthood: an experimental study. *Dev Psychol*, *41*(4), 625.
- Garg, N., & Lerner, J. S. (2013). Sadness and consumption. *Journal of Consumer Psychology*, *23*(1), 106-113.
- Garg, N., Wansink, B., & Inman, J. J. (2007). The influence of incidental affect on consumers' food intake. *Journal of Marketing*, *71*(1), 194-206.
- Gilman, T. L., Shaheen, R., Nylocks, K. M., Halachoff, D., Chapman, J., Flynn, J. J., . . . Coifman, K. G. (2017). A film set for the elicitation of emotion in research: A comprehensive catalog derived from four decades of investigation. *Behavior Research Methods*, *49*(6), 2061-2082.
- Glad, W., & Adesso, V. J. (1976). The relative importance of socially induced tension and behavioral contagion for smoking behavior. *J Abnorm Psychol*, *85*(1), 119.
- Goldsmith, A. A. (2008). *Effects of mood induction on the relationship between generalized anxiety and alcohol-related beliefs in young adult drinkers*. University of Cincinnati,

- Grunberg, N. E., & Straub, R. O. (1992). The role of gender and taste class in the effects of stress on eating. *Health Psychology, 11*(2), 97.
- Heatherton, T. F., Herman, C. P., & Polivy, J. (1991). Effects of physical threat and ego threat on eating behavior. *Journal of Personality and Social Psychology, 60*(1), 138.
- Heatherton, T. F., Strieppe, M., & Wittenberg, L. (1998). Emotional distress and disinhibited eating: The role of self. *Personality and Social Psychology Bulletin, 24*(3), 301-313.
- Herhaus, B., Päßler, S., & Petrowski, K. (2018). Stress-related laboratory eating behavior in adults with obesity and healthy weight. *Physiol Behav, 196*, 150-157.
- Hillebrand, J. (2000). New perspectives on the manipulation of opiate urges and the assessment of cognitive effort associated with opiate urges. *Addict Behav, 25*(1), 139-143.
- Houlihan, A. E. (2008). *Stress and self-control: A test of contrasting pathways to health risk behavior*. Iowa State University,
- Hufford, M. (1998). *Drowning your sorrows: The effects of a negative mood induction on normal drinkers' alcohol expectancies*. University of Pittsburgh,
- Jansen, A., Vanreyten, A., van Balveren, T., Roefs, A., Nederkoorn, C., & Havermans, R. (2008). Negative affect and cue-induced overeating in non-eating disordered obesity. *Appetite, 51*(3), 556-562.
- Klein, M. I. (1996). *Effect of induced depressed mood on subclinical anorexics and bulimics, and restrained and unrestrained eaters*. (57), ProQuest Information & Learning, US.
- Larsen, H., Engels, R. C., Granic, I., & Huizink, A. C. (2013). Does Stress Increase Imitation of Drinking Behavior? An Experimental Study in a (Semi-) Naturalistic Context. *Alcoholism: Clinical Experimental Research, 37*(3), 477-483.
- Lindgren, K. P., Ramirez, J. J., Wiers, R. W., Teachman, B. A., Norris, J., Olin, C. C., . . . Neighbors, C. (2018). Mood selectively moderates the implicit alcohol association–drinking relation in college student heavy episodic drinkers. *Psychology of Addictive Behavior, 32*(3), 338.
- Loxton, N. J., Dawe, S., & Cahill, A. (2011). Does negative mood drive the urge to eat? The contribution of negative mood, exposure to food cues and eating style. *Appetite, 56*(2), 368-374.
- Mayer, B., Bos, A. E., Muris, P., Huijding, J., & Vlieland, M. (2008). Does disgust enhance eating disorder symptoms? *Eating Behaviors, 9*(1), 124-127.
- McKee, S. A., Wall, A.-M., Hinson, R. E., Goldstein, A., & Bissonnette, M. (2003). Effects of an implicit mood prime on the accessibility of smoking expectancies in college women. *Psychology of Addictive Behavior, 17*(3), 219.
- McQueen, A. L. (2003). *The effects of self-affirmation and positive mood on the reduction of defensiveness after exposure to personally relevant health-risk information*. (63), ProQuest Information & Learning, US.
- Meyer, C., & Waller, G. (1999). The impact of emotion upon eating behavior: The role of subliminal visual processing of threat cues. *International Journal of Eating Disorders, 25*(3), 319-326.
- Monreal, T. K. (2012). *The role of impulsivity, affect, and expectations in alcohol use and disordered eating*. University of California San Diego,
- Morrison, P. M., Noel, N. E., & Ogle, R. L. (2012). Do angry women choose alcohol? *Addict Behav, 37*(8), 908-913.
- Munsch, S., Michael, T., Biedert, E., Meyer, A., & Margraf, J. (2008). Negative mood induction and unbalanced nutrition style as possible triggers of binges in binge eating disorder

- (BED). *Eating & Weight Disorders: Studies on Anorexia, Bulimia, & Obesity*, 13(1), 22-29.
- Nesic, J., & Duka, T. (2006). Gender specific effects of a mild stressor on alcohol cue reactivity in heavy social drinkers. *Pharmacology Biochemistry & Behavior*, 83(2), 239-248.
- Newman, E., O'Connor, D. B., & Conner, M. (2008). Attentional biases for food stimuli in external eaters: possible mechanism for stress-induced eating? *Appetite*, 51(2), 339-342.
- Persky, S., Ferrer, R. A., & Klein, W. M. (2016). Genomic information may inhibit weight-related behavior change inclinations among individuals in a fear state. *Annals of Behavioral Medicine*, 50(3), 452-459.
- Petrican, R., Burris, C. T., & Moscovitch, M. (2015). Shame, sexual compulsivity, and eroticizing flirtatious others: an experimental study. *The Journal of Sex Research*, 52(1), 98-109.
- Polivy, J., Herman, C. P., & McFarlane, T. (1994). Effects of anxiety on eating: Does palatability moderate distress-induced overeating in dieters? *J Abnorm Psychol*, 103(3), 505.
- Pomery, E. A. (2009). *The influence of positive and negative affect on the processing of outcome expectancies related to risky sexual practices*. (70), ProQuest Information & Learning, US.
- Raghunathan, R., & Trope, Y. (2002). Walking the tightrope between feeling good and being accurate: Mood as a resource in processing persuasive messages. *Journal of Personality and Social Psychology*, 83(3), 510.
- Ralston, T. E., & Palfai, T. P. (2010). Effects of depressed mood on drinking refusal self-efficacy: Examining the specificity of drinking contexts. *Cogn Behav Ther*, 39(4), 262-269.
- Read, J. P., & Curtin, J. J. (2007). Contextual influences on alcohol expectancy processes. *Journal of Studies on Alcohol and Drugs*, 68(5), 759-770.
- Reznick, H., & Balch, P. (1977). The effects of anxiety and response cost manipulations on the eating behavior of obese and normal-weight subjects. *Addict Behav*, 2(4), 219-225.
- Ridgway, P. S., & Jeffrey, D. B. (1998). A comparison of the Three-Factor Eating Questionnaire and the Restraint Scale and consideration of Lowe's three-factor model. *Addict Behav*, 23(1), 115-118.
- Rotenberg, K. J., & Flood, D. (1999). Loneliness, dysphoria, dietary restraint, and eating behavior. *International Journal of Eating Disorders*, 25(1), 55-64.
- Rousseau, G. S., Irons, J. G., & Correia, C. J. (2011). The reinforcing value of alcohol in a drinking to cope paradigm. *Drug & Alcohol Dependence*, 118(1), 1-4.
- Salerno, A., Laran, J., & Janiszewski, C. (2014). Hedonic eating goals and emotion: When sadness decreases the desire to indulge. *Journal of Consumer Research*, 41(1), 135-151.
- Scattolon, Y. S., & Nicki, R. M. (1995). Worry as an inhibitor of dietary restraint. *Behavioural Cognitive Psychotherapy*, 23(1), 25-33.
- Shapiro, J. R., & Anderson, D. A. (2005). Counterregulatory eating behavior in multiple item test meals. *Eating Behaviors*, 6(2), 169-178.
- Shmueli, D., & Prochaska, J. J. (2012). A test of positive affect induction for countering self-control depletion in cigarette smokers. *Psychology of Addictive Behavior*, 26(1), 157.
- Sproesser, G., Schupp, H. T., & Renner, B. (2014). The bright side of stress-induced eating: eating more when stressed but less when pleased. *Psychological Science*, 25(1), 58-65.
- Steiner, S. M. (2004). *The role of affective memories and mood in judgments of alcohol use*. (64), ProQuest Information & Learning, US.

- Stojek, M. K., Fischer, S., & MacKillop, J. (2015). Stress, cues, and eating behavior. Using drug addiction paradigms to understand motivation for food. *Appetite*, *92*, 252-260.
- Telch, C. F., & Agras, W. S. (1996). Do emotional states influence binge eating in the obese? *International Journal of Eating Disorders*, *20*(3), 271-279.
- Thomas, S. E., Bacon, A. K., Randall, P. K., Brady, K. T., & See, R. E. (2011). An acute psychosocial stressor increases drinking in non-treatment-seeking alcoholics. *Psychopharmacology (Berl)*, *218*(1), 19-28.
- Thomas, S. E., Merrill, J. E., von Hofe, J., & Magid, V. (2014). Coping motives for drinking affect stress reactivity but not alcohol consumption in a clinical laboratory setting. *Journal of Studies on Alcohol*, *75*(1), 115-123.
- Trautmann, S., Muehlhan, M., Kirschbaum, C., Wittchen, H. U., Höfler, M., Stalder, T., & Steudte-Schmiedgen, S. (2018). Biological stress indicators as risk markers for increased alcohol use following traumatic experiences. *Addiction Biology*, *23*(1), 281-290.
- Turner, S. A., Luszczynska, A., Warner, L., & Schwarzer, R. (2010). Emotional and uncontrolled eating styles and chocolate chip cookie consumption. A controlled trial of the effects of positive mood enhancement. *Appetite*, *54*(1), 143-149.
- Tybur, J. M., Bryan, A. D., Lieberman, D., Hooper, A. E. C., & Merriman, L. A. (2011). Sex differences and sex similarities in disgust sensitivity. *Personality and Individual Differences*, *51*(3), 343-348.
- van Strien, T., Herman, C. P., Anschutz, D. J., Engels, R. C., & de Weerth, C. (2012). Moderation of distress-induced eating by emotional eating scores. *Appetite*, *58*(1), 277-284.
- von Helversen, B., Amstadt, C., Klotz, J., & Neth, A., & Schneider, S. . (2015). The effect of valence and arousal on foodchoice. *Unpublished manuscript*.
- Wardell, J. D., Read, J. P., Curtin, J. J., & Merrill, J. E. (2012). Mood and implicit alcohol expectancy processes: Predicting alcohol consumption in the laboratory. *Alcoholism: Clinical Experimental Research*, *36*(1), 119-129.
- Weinberger, A. H., & McKee, S. A. (2011). Gender differences in smoking following an implicit mood induction. *Nicotine & Tobacco Research*, *14*(5), 621-625.
- Werthmann, J., Renner, F., Roefs, A., Huibers, M. J., Plumanns, L., Krott, N., & Jansen, A. (2014). Looking at food in sad mood: Do attention biases lead emotional eaters into overeating after a negative mood induction? *Eating Behaviors*, *15*(2), 230-236.
- Wilcox, K., Kramer, T., & Sen, S. (2010). Indulgence or self-control: A dual process model of the effect of incidental pride on indulgent choice. *Journal of Consumer Research*, *38*(1), 151-163.
- Wildes, J. E., Marcus, M. D., Bright, A. C., & Dapelo, M. M. (2012). Emotion and eating disorder symptoms in patients with anorexia nervosa: An experimental study. *International Journal of Eating Disorders*, *45*(7), 876-882.
- Willner, P., Benton, D., Brown, E., Cheeta, S., Davies, G., Morgan, J., & Morgan, M. (1998). "Depression" increases "craving" for sweet rewards in animal and human models of depression and craving. *Psychopharmacology (Berl)*, *136*(3), 272-283.
- Willner, P., Field, M., Pitts, K., & Reeve, G. (1998). Mood, cue and gender influences on motivation, craving and liking for alcohol in recreational drinkers. *Behavioural Pharmacology*.
- Winterich, K. P., & Haws, K. L. (2011). Helpful hopefulness: The effect of future positive emotions on consumption. *Journal of Consumer Research*, *38*(3), 505-524.

- Yeomans, M. R., & Coughlan, E. (2009). Mood-induced eating. Interactive effects of restraint and tendency to overeat. *Appetite, 52*(2), 290-298.
- Zack, M., Poulos, C. X., Aramakis, V. B., Khamba, B. K., & MacLeod, C. M. (2007). Effects of drink-stress sequence and gender on alcohol stress response dampening in high and low anxiety sensitive drinkers. *Alcoholism: Clinical Experimental Research, 31*(3), 411-422.
- Zack, M., Poulos, C. X., Fragopoulos, F., Woodford, T. M., & MacLeod, C. M. (2006). Negative affect words prime beer consumption in young drinkers. *Addict Behav, 31*(1), 169-173.
